# Supplementary material
Source: ML conference proceedings conference paper supplement (https://openreview.net/forum?id=rbYPITgH4Z)
Supplement: supplementary_material [file appendix.pdf › appendix.pdf]

## A Runtime of ERS.

We provide an analysis of ERS runtime. Let  $\omega = \max_{x,y} P_{Y|X}(y|x)/Q(y)$  and  $\omega_x = \max_y P_{Y|X}(y|x)/Q(y)$ , where  $P_{Y|X=x}$  is the target distribution and  $Q_Y$  is the proposal distribution. For the batch size  $N$  and input  $x$ , we have the following bound on the average batch acceptance probability  $\Delta_x$ , which we will show in Appendix E.1:

$$\Delta_x \geq \frac{N}{N-1+\omega_x} \geq \frac{N}{N-1+\omega}, \quad (14)$$

Thus, the expected number of batches in ERS is:

$$\text{Expected Number of Batches} = \frac{1}{\Delta_x} \leq \frac{N-1+\omega}{N}, \quad (15)$$

which leads to the runtime, i.e. the expected number of proposals as:

$$\text{Expected Runtime} = \frac{N}{\Delta_x} \leq N-1+\omega. \quad (16)$$

In practice, since we typically choose  $N = O(\omega)$ , the expected runtime is also  $O(\omega)$ .

## B Coding Cost of Standard Rejection Sampling

For the proof, we generalize and use  $P(\cdot)$  and  $Q(\cdot)$  as the target and proposal distributions. This allows shorthand the notations while also generalizing the results for arbitrary distributions.

### B.1 Extension of Braverman and Garg [4]’s Method for Continuous Setting

This method is an extension of the work by Braverman and Garg [4] to the continuous setting. The core idea is to divide the acceptance region into smaller bins, visualized in Figure 7. Specifically, for each pair  $(U_i, Y_i)$  from  $W$ , we denote  $\tilde{U}_i = \omega U_i Q(Y_i)$ . The encoder selects the index  $K$  according to rejection sampling rule, which is 7 in Figure 7. It then sends the bin index of the first accepted sample, where the bin corresponds to the smallest scaled region that  $\tilde{U}_K$  belongs to. In Figure 7, this corresponds to the orange region and the content of the message is 3. Then the encoder sends another message which indicates the rank of the selected sample within that bin, which is 1. The decoder then  $K$  accordingly. Formally, the two steps are as follow:

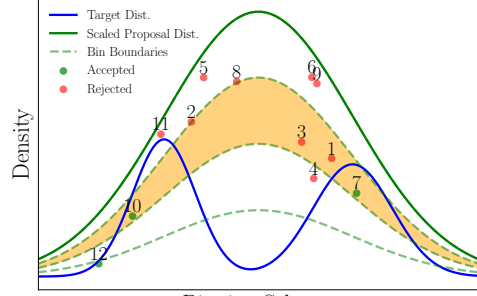

Figure 7: Binning Method for RS.

- *Binning*: The encoder sends to the decoder the ceiling  $T = \lceil \frac{\tilde{U}_K}{Q(Y_K)} \rceil$ . Upon receiving  $T$ , the decoder collects the set:

$$\mathcal{S}_T = \{i | (T-1)Q(Y_i) \leq \tilde{U}_i \leq TQ(Y_i)\}, \quad (17)$$

- *Index Selection*: The encoder locates the original chosen index  $K$  within  $\mathcal{S}_T$ , says  $G$ , and send  $G$  to the receiver. We have  $\mathbb{E}[\log G] \leq 1$ .

*Binning Step.* We will show the  $\mathbb{E}[\log T] \leq D_{KL}(P||Q) + \log(e)$ , adapting the proof for the discrete case presented in [33]. First, we note that:

$$Y_K \sim P(\cdot), \quad U_K | Y_K \sim \mathcal{U}\left(0, \frac{P(Y_K)}{\omega Q(Y_K)}\right) \quad (18)$$

817 We then have:

$$\mathbb{E}[\log T] = \mathbb{E} \left[ \log \left( \left\lceil \frac{\tilde{U}_K}{Q(Y_K)} \right\rceil \right) \right] \quad (19)$$

$$\leq \mathbb{E} \left[ \log \left( 1 + \frac{\tilde{U}_K}{Q(Y_K)} \right) \right] \quad (20)$$

$$= \mathbb{E} [\log (1 + \omega U_K)] \quad (21)$$

$$= \mathbb{E} [\mathbb{E} [\log (1 + \omega U_K) | Y_K]] \quad (22)$$

$$= \int_{-\infty}^{+\infty} P(y) \left[ \frac{\omega Q(y)}{P(y)} \int_0^{\omega^{-1} P(y)/Q(y)} \log(1 + \omega u) du \right] dy \quad (\text{Due to (18)}) \quad (23)$$

$$\leq \int_{-\infty}^{+\infty} P(y) \left[ \frac{\omega Q(y)}{P(y)} \int_0^{\omega^{-1} P(y)/Q(y)} \log \left( 1 + \frac{P(y)}{Q(y)} \right) du \right] dy \quad (24)$$

$$\leq \int_{-\infty}^{+\infty} P(y) \left[ \frac{\omega Q(y)}{P(y)} \int_0^{\omega^{-1} P(y)/Q(y)} \log \left( \frac{P(y)}{Q(y)} \right) + \frac{Q(y) \log(e)}{P(y)} du \right] dy \quad (25)$$

$$= \int_{-\infty}^{+\infty} P(y) \log \left( \frac{P(y)}{Q(y)} \right) dy + \int_{-\infty}^{+\infty} Q(y) \log(e) dy \quad (26)$$

$$= D_{KL}(P||Q) + \log(e), \quad (27)$$

818 where we use the following results for the last inequality:

$$\log(1 + x) \leq \log(x) + \frac{\log(e)}{x} \quad (\text{for all } x > -1). \quad (28)$$

819 *Index Selection Step.* We first show that  $\mathbb{E}[G] \leq 2$  by using recursion. We define  $\mathcal{A}$  as an event  
 820 where the first samples is accepted, i.e.  $U_1 \leq \frac{P(Y_1)}{\omega Q(Y_1)}$ . Then, if  $\mathcal{A}$  happens then we have  $G = 1$ , i.e.  
 821  $\mathbb{E}[G|\mathcal{A}] = 1$ , since it is also the first sample in  $\mathcal{S}_T$ .

822 Before proceeding to the case where  $\mathcal{A}$  does not happen, i.e.  $\bar{\mathcal{A}}$ , we define the following random  
 823 variable  $M = \mathbb{1}[1 \in \mathcal{S}_T]$ , i.e.  $M = 1$  if the first proposed sample from  $W$  stays within the ceiling  
 824  $(T-1)Q(Y_1) \leq \tilde{U}_1 \leq TQ(Y_1)$  and  $M = 0$  otherwise.

825 Then we have the two following recursion identities:

$$\begin{cases} \mathbb{E}[G|\bar{\mathcal{A}}, M = 0] = \mathbb{E}[G] \\ \mathbb{E}[G|\bar{\mathcal{A}}, M = 1] = 1 + \mathbb{E}[G] \end{cases} \quad (29)$$

826 For the first equality, given that the first sample  $U_1, Y_1$  does not stay within  $\mathcal{S}_T$  does not implies any  
 827 information about  $G$ , since all the samples are i.i.d. For the second equality takes into account the  
 828 fact that we now accept the first sample  $(U_1, Y_1)$  and repeat the counting process. Hence, we have:

$$\mathbb{E}[G|\bar{\mathcal{A}}] = \Pr(M = 0|\bar{\mathcal{A}})\mathbb{E}[G|\bar{\mathcal{A}}, M = 0] + \Pr(M = 1|\bar{\mathcal{A}})\mathbb{E}[G|\bar{\mathcal{A}}, M = 1] \quad (30)$$

$$= \mathbb{E}[G] + \Pr(M = 1|\bar{\mathcal{A}}) \quad (31)$$

829 We now express  $\mathbb{E}[G]$  as follows:

$$\mathbb{E}[G] = \Pr(\mathcal{A})\mathbb{E}[G|\mathcal{A}] + \Pr(\bar{\mathcal{A}})\mathbb{E}[G|\bar{\mathcal{A}}] \quad (32)$$

$$= \Pr(\mathcal{A}) + \Pr(\bar{\mathcal{A}})(\mathbb{E}[G] + \Pr(M = 1|\bar{\mathcal{A}})) \quad (33)$$

830 Rearranging the terms, we obtain:

$$\mathbb{E}[G] = 1 + \frac{\Pr(M = 1, \bar{\mathcal{A}})}{\Pr(\mathcal{A})} \quad (34)$$

831 We have  $\Pr(A) = \int_{-\infty}^{\infty} \omega^{-1} P(y) Q^{-1}(y) Q(y) dy = \omega^{-1}$ . For  $\Pr(M = 1, \bar{A})$ , we have:

$$\Pr(M = 1, \bar{A}) \leq \Pr(M = 1) \quad (35)$$

$$= \sum_{t=0}^{\infty} \Pr((T-1)Q(Y_1) \leq \tilde{U}_1 \leq (T-1)Q(y), T=t) \quad (36)$$

$$= \sum_{t=0}^{\infty} \Pr((t-1)Q(Y_1) \leq \tilde{U}_1 \leq (t-1)Q(y)) \Pr(T=t) \quad (37)$$

$$= \sum_{t=0}^{\infty} \omega^{-1} \Pr(T=t) \quad (38)$$

$$= \omega^{-1} \quad (39)$$

832 Thus, we obtain  $\mathbb{E}[G] \leq 2$  and hence  $\mathbb{E}[\log G] \leq 1$ .

## 833 B.2 The Sorting Method

834 The encoding process is as follows:

- 835 • *Grouping*: the encoder sends the ceiling  $L = \lceil \frac{K}{\lfloor \omega \rfloor} \rceil$  to the decoder. The decoder then knows  
836  $(L-1)\omega + 1 \leq K \leq L\omega$ , i.e.  $K$  is in range  $L$ . We have  $\mathbb{E}[\log L] = 1$  bit.
- 837 • *Sorting*: The encoder and decoder both sort the uniform random variables  $U_i$  within the  
838 selected range  $(L-1)\lfloor \omega \rfloor + 1 \leq i \leq L\lfloor \omega \rfloor$ . Let the sorted list be  $U_{\pi(1)} \leq U_{\pi(2)} \leq$   
839  $\dots \leq U_{\pi(\lfloor \omega \rfloor)}$  where  $\pi(\cdot)$  is the mapping between the sorted index and the original unsorted  
840 one. The encoder sends the rank of  $U_K$  within this list, i.e. sends the value  $\hat{K}$  such that  
841  $K = \pi(\hat{K})$ . The decoder receive  $\hat{K}$  and retrieve  $Y_K$  accordingly. The coding cost for this  
842 step is  $D_{KL}(P||Q) + \log(e)$ .

843 We provide detail analysis for each step below:

844 *Grouping Step*. Since each proposal is accepted with probability  $\omega^{-1}$ , this means:

$$\Pr(K > \ell \lfloor \omega \rfloor) = (1 - \omega^{-1})^{\ell \lfloor \omega \rfloor} < \left(\frac{1}{2}\right)^{\ell}, \quad (40)$$

845 where we will prove the RHS inequality in Appendix B.3. Hence, we have  $\Pr(L > \ell) < (\frac{1}{2})^{-\ell}$  and:

$$\mathbb{E}[L] = \sum_{\ell=0}^{\infty} \Pr(L > \ell) < 1 + 0.5^{-1} + 0.5^{-2} + \dots = 2. \quad (41)$$

846 Finally, using Jensen's inequality, we have:

$$\mathbb{E}[\log L] \leq \log(\mathbb{E}[L]) = 1. \quad (42)$$

847 *Sorting Step*. To bound the coding cost in step 2, we first express  $\mathbb{E}[\log \hat{K}]$  with the rule of conditional  
848 expectation as follows:

$$\mathbb{E}[\log \hat{K}] = \int_{-\infty}^{\infty} P(y) \mathbb{E}[\log \hat{K} | Y_K = y] dy \quad (43)$$

$$= \int_{-\infty}^{\infty} P(y) \left( \int_{-\infty}^{\infty} \mathbb{E}[\log \hat{K} | Y_K = y, U_K = u] P(U_K = u | Y_K = y) du \right) dy \quad (44)$$

$$= \int_{-\infty}^{\infty} P(y) \left( \int_0^{\frac{P(y)}{\omega Q(y)}} \mathbb{E}[\log \hat{K} | Y_K = y, U_K = u] \frac{\omega Q(y)}{P(y)} du \right) dy, \quad (45)$$

849 where the last step,  $P(U_K = u | Y_K = y) = \frac{\omega Q(y)}{P(y)}$  for  $0 \leq u \leq \frac{P(y)}{\omega Q(y)}$  is due to the acceptance  
850 condition in rejection sampling. We will show in Section B.3.1 that:

$$\mathbb{E}[\log \hat{K} | Y_K = y, U_K = u] \leq \log(\omega u + 1) \quad (46)$$

851 Then, combining this with Equation (45), we obtain:

$$\mathbb{E}[\log \hat{K}] \leq \int_{-\infty}^{\infty} P(y) \left( \int_0^{\frac{P(y)}{\omega Q(y)}} \frac{\omega Q(y)}{P(y)} \log(\omega u + 1) du \right) dy \quad (47)$$

$$\leq \int_{-\infty}^{\infty} P(y) \left( \int_0^{\frac{P(y)}{\omega Q(y)}} \frac{\omega Q(y)}{P(y)} \log \left( \frac{P(y)}{Q(y)} + 1 \right) du \right) dy \quad (48)$$

$$= \int_{-\infty}^{\infty} P(y) \left[ \frac{P(y)}{\omega Q(y)} \frac{\omega Q(y)}{P(y)} \log \left( \frac{P(y)}{Q(y)} + 1 \right) \right] dy \quad (49)$$

$$= \int_{-\infty}^{\infty} P(y) \log \left( \frac{P(y)}{Q(y)} + 1 \right) dy \quad (50)$$

$$\leq \int_{-\infty}^{\infty} P(y) \left[ \log \left( \frac{P(y)}{Q(y)} \right) + \frac{\log(e)Q(y)}{P(y)} \right] dy \quad (51)$$

$$= D_{KL}(P||Q) + \log(e) \quad (52)$$

852 Hence, we have  $\mathbb{E}[\log \hat{K}] \leq D_{KL}(P||Q) + \log(e)$  on average.

### 853 B.3 Proof for Inequality (40)

854 The proof for this inequality is self-contained. We want to prove that for any  $\omega \geq 1$ , we have:

$$f(\omega) = (1 - \omega^{-1})^{\lfloor \omega \rfloor} \leq \frac{1}{2}. \quad (53)$$

Consider the behavior of  $f(\omega)$  at every interval  $[n, n+1)$  where  $n \in \mathbb{Z}^+, n \geq 1$ . Since  $\omega \geq 1$ , the function  $f_n(\omega) = (1 - \omega^{-1})^n$  is increasing and hence:

$$\sup_{\omega} f_n(\omega) = \left( 1 - \frac{1}{n+1} \right)^n = \left( \frac{n}{n+1} \right)^n$$

855 for every interval  $[n, n+1)$ . We will show that  $\sup_{\omega} f_n(\omega)$  is decreasing for  $n \geq 1$  and thus we have  
856  $\sup_{\omega} f(\omega) = \sup_{\omega} f_1(\omega) = \frac{1}{2}$ .

857 Consider the function  $g(x) = \left( \frac{x}{x+1} \right)^n$  for  $x \geq 1, x \in \mathbb{R}$ . Let  $h(x) = \ln(g(x)) = x \ln\left(\frac{x}{x+1}\right)$ , then  
858 we simply need to show  $h(x)$  is decreasing. Consider its first derivative:

$$h'(x) = \ln \left( \frac{x}{x+1} \right) + \frac{1}{x+1} \leq 0, \quad (54)$$

859 since:

$$\ln \left( \frac{x}{x+1} \right) = \ln \left( 1 - \frac{1}{x+1} \right) \leq -\frac{1}{x+1} \quad (55)$$

860 due to the inequality  $\ln(1+y) < y$  for all  $y$ .

#### 861 B.3.1 Proof for Inequality (46)

862 We begin by applying Jensen's inequality for concave function  $\log(x)$ :

$$\mathbb{E}[\log \hat{K} | Y_K = y, U_K = u] \leq \log \mathbb{E}[\hat{K} | Y_K = y, U_K = u] \quad (\text{by Jensen's Inequality}) \quad (56)$$

$$= \log \mathbb{E}_L[\mathbb{E}[\hat{K} | Y_K = y, U_K = u, L = \ell]] \quad (57)$$

863 Given  $K$  is within the range  $L = \ell$  and  $U_K = u$ , we can express  $\hat{K}$  as follows:

$$\hat{K} = |\{U_i < u, (\ell-1)\lfloor \omega \rfloor + 1 \leq i \leq \ell\lfloor \omega \rfloor\}| + 1, \quad (58)$$

$$= \Omega(u, \ell) + 1 \quad (59)$$

864 i.e. the number of  $U_i$  (plus 1 for the ranking) within the range  $L$  that has value lesser than  $u$ .

865 We can see that the the index  $i$  within the range  $L$  satisfying  $U_i < u$  are from the index that are either  
 866 (1) rejected, i.e. index  $i < K$  or (2) not examined by the algorithm, i.e. index  $i > K$ . The rest of this  
 867 proof will show the following upperbound:

$$\mathbb{E}[\Omega(u, \ell) | Y_K = y, U_K = u, L = \ell] \leq \omega u, \text{ for any } \ell \quad (60)$$

868 For readability, we split the proof into different proof steps.

869 **Proof Step 1:** We condition on the mapped index of  $\pi(\hat{K})$  on the original array:

$$\mathbb{E}[\hat{K} | Y_K = y, U_K = u, L = \ell] \quad (61)$$

$$= \mathbb{E}_{\pi(\hat{K})} \left[ \mathbb{E}[\hat{K} | Y_K = y, U_K = u, L = \ell, \pi(\hat{K}) = k] \right] \quad (62)$$

$$= \mathbb{E}_{\pi(\hat{K})} \left[ \mathbb{E}[\Omega(u, \ell) + 1 | Y_K = y, U_K = u, L = \ell, \pi(\hat{K}) = k] \right] \quad (63)$$

$$= \mathbb{E}_{\pi(\hat{K})} \left[ \mathbb{E}[\Omega(u, \ell) | Y_K = y, U_K = u, L = \ell, \pi(\hat{K}) = k] \right] + 1 \quad (64)$$

$$= \mathbb{E}_{\pi(\hat{K})} \left[ \mathbb{E}[\Omega_1(u, \ell, k) + \Omega_2(u, \ell, k) | Y_K = y, U_K = u, L = \ell, \pi(\hat{K}) = k] \right] + 1, \quad (65)$$

870 where  $\Omega_1(u, \ell, k)$ ,  $\Omega_2(u, \ell, k)$  are the number of  $U_i < u$  within the range  $L = \ell$  that occurs before  
 871 and after the selected index  $k$  respectively. Specifically:

$$\Omega_1(u, \ell, k) = |\{U_i < u, (\ell - 1)\lfloor \omega \rfloor + 1 \leq i < (\ell - 1)\lfloor \omega \rfloor + k\}| \quad (66)$$

$$\Omega_2(u, \ell, k) = |\{U_i < u, (\ell - 1)\lfloor \omega \rfloor + k + 1 \leq i \leq \ell\lfloor \omega \rfloor\}|, \quad (67)$$

872 which also naturally gives  $\Omega(u, \ell) = \Omega_1(u, \ell, k) + \Omega_2(u, \ell, k)$ .

**Proof Step 2:** Consider  $\Omega_2(u, \ell, k)$ , since each proposal  $(Y_i, U_i)$  is i.i.d distributed and the fact that  $k$  is the index of the accepted sample, for every  $i > K$ , we have:

$$\Pr(U_i < u | Y_K = y, U_K = u, L = \ell, \pi(\hat{K}) = k) = \Pr(U_i < u)$$

873 This gives us:

$$\mathbb{E}[\Omega_2(u, \ell, k) | Y_K = y, U_K = u, L = \ell, \pi(\hat{K}) = k] = (\lfloor \omega \rfloor - k) \Pr(U < u) \quad (68)$$

$$= (\lfloor \omega \rfloor - k)u \quad (69)$$

$$\leq \frac{(\lfloor \omega \rfloor - k)u}{\Pr(\text{reject a sample})} \quad (70)$$

$$\leq \frac{(\lfloor \omega \rfloor - k)u}{1 - \omega^{-1}} \quad (71)$$

874 **Proof Step 3:** For  $\Omega_1(u, \ell, k)$ , we do not have such independent property since for every sample  
 875 with index  $i < K$ , we know that they are rejected samples, and hence for  $i < k$ :

$$\Pr(U_i < u | Y_K = y, U_K = u, L = \ell, \pi(\hat{K}) = k) = \Pr(U_i < u | Y_i \text{ is rejected}) \quad (72)$$

$$= \frac{\Pr(U_i < u, Y_i \text{ is rejected})}{\Pr(Y_i \text{ is rejected})} \quad (73)$$

$$\leq \frac{\Pr(U_i < u)}{\Pr(Y_i \text{ is rejected})} \quad (74)$$

$$= \frac{u}{1 - \omega^{-1}}, \quad (75)$$

876 which gives us:

$$\mathbb{E}[\Omega_2(u, \ell, k) | Y_K = y, U_K = u, L = \ell, \pi(\hat{K}) = k] \leq \frac{(k - 1)u}{1 - \omega^{-1}} \quad (76)$$

877 To prove Equation (72), note that the following events are equivalent:

$$\{Y_K = y, U_K = u, L = \ell, \pi(\hat{K}) = k\} = \{Y_k = y, U_k = u, Y_{1 \dots k-1} \text{ are rejected}\} \quad (77)$$

$$\triangleq \Lambda(u, y, k) \quad (78)$$

878 Here, we note that  $Y_k, U_k$  denote the value at index  $k$  within  $W$ , which is different from  $Y_K, U_K$ , the  
 879 value selected by the rejection sampler. Hence:

$$\Pr(U_i < u | \Lambda(u, y, k)) = \frac{\Pr(U_i < u, Y_{1\dots k-1} \text{ are rejected} | Y_k = y, U_k = u)}{\Pr(Y_{1\dots k-1} \text{ are rejected} | Y_k = y, U_k = u)} \quad (79)$$

$$= \frac{\Pr(U_i < u, Y_{1\dots k-1} \text{ are rejected})}{\Pr(Y_{1\dots k-1} \text{ are rejected})} \quad (\text{Since } (Y_i, U_i) \text{ are i.i.d}) \quad (80)$$

$$= \Pr(U_i < u | Y_i \text{ is rejected}), \quad (81)$$

880 **Proof Step 4:** From the above result from Step 2 and 3, we have  $\Omega(u, \ell) = \Omega_1(u, \ell, k) +$   
 881  $\Omega_2(u, \ell, k) \leq \omega u$  and as a result:

$$\mathbb{E}[K | Y_K = y, U_K = u, L = \ell] \leq \frac{(\lfloor \omega \rfloor - 1)u}{1 - \omega^{-1}} + 1 \quad (82)$$

$$\leq \frac{(\omega - 1)u}{1 - \omega^{-1}} + 1 \quad (\text{Since } \lfloor \omega \rfloor \leq \omega) \quad (83)$$

$$= \omega u + 1 \quad (84)$$

882 which completes the proof.

#### 883 B.4 Overall Coding Cost.

884 We now provide the upperbound on  $H[K]$  for our *Sorting Method*. Since the message in the *Binning*  
 885 *Method* also consists of two parts, the results are the same. For each part of the message, namely  $L$   
 886 and  $K$ , we encode it with a prefix-code from Zipf distribution [25]. For  $H[L]$ , we have:

$$H[L] \leq \mathbb{E}_X[\mathbb{E}[\log L | X = x]] + \log(\mathbb{E}_X[\mathbb{E}[\log L | X = x]] + 1) + 1 \quad (85)$$

$$= 3 \text{ bits} \quad (86)$$

887 Hence, the rate for the first message is  $R_1 \leq H[L] + 1 = 4\text{bits}$ .

888 Similarly, for  $H[\hat{K}]$ :

$$H[\hat{K}] \leq \mathbb{E}_X[\mathbb{E}[\log \hat{K} | X = x]] + \log(\mathbb{E}_X[\mathbb{E}[\log \hat{K} | X = x]] + 1) + 1 \quad (87)$$

$$= I(X; Y) + \log(e) + \log(I(X; Y) + \log(e) + 1) + 1 \quad (88)$$

$$\leq I(X; Y) + \log(I(X; Y) + 1) + 2\log(e) + 1 \quad (89)$$

889 Hence, the rate for the second message is  $R_2 \leq H[\hat{K}] + 1 = I(X; Y) + \log(I(X; Y) + 1) +$   
 890  $2\log(e) + 2\text{bits}$ . Also note that:

$$H[K|W] = H[L, \hat{K}|W] \quad (\text{Given } W, K \text{ and } (L, \hat{K}) \text{ are bijective}) \quad (90)$$

$$\leq H[L|W] + H[\hat{K}|W] \quad (91)$$

$$\leq H[L] + H[\hat{K}] \quad (92)$$

$$\leq I(X; Y) + \log(I(X; Y) + 1) + 7 \text{ (bits)} \quad (93)$$

891 Since we are compressing two messages separately, we have:  $R \leq R_1 + R_2 = I(X; Y) +$   
 892  $\log(I(X; Y) + 1) + 9 \text{ (bits)}$

## 893 C Matching Probability of Rejection Sampling

### 894 C.1 Distributed Matching Probabilities of RS

895 Follow the setup in Section 3.2.1, each party independently performs RS using the proposal distribu-  
 896 tion  $Q_Y(\cdot)$  to select indices  $K_A$  and  $K_B$  and set  $(Y_A, Y_B) = (Y_{K_A}, Y_{K_B})$ . We assume the bounding  
 897 condition holds for both parties, i.e.  $\max_y (P_Y^A(y)Q_Y^{-1}(y), P_Y^B(y)Q_Y^{-1}(y)) \leq \omega$ , Proposition C.1  
 898 shows the probability that they select the same index, given that  $Y_{K_A} = y$ .

899 **Proposition C.1.** Let  $W, Q(\cdot), P_Y^A(\cdot)$  and  $P_Y^B(\cdot)$  defined as above. Then we have:

$$\Pr(Y_A = Y_B | Y_A = y) = \frac{\min(1, P_Y^B(y)/P_Y^A(y))}{1 + \text{TV}(P_Y^A, P_Y^B)} \geq \frac{1}{2(1 + P_Y^A(y)/P_Y^B(y))} \quad (94)$$

900 Furthermore, we have:

$$\Pr(Y_{K_A} = Y_{K_B}) = \frac{1 - \text{TV}(P_Y^A, P_Y^B)}{1 + \text{TV}(P_Y^A, P_Y^B)}. \quad (95)$$

901 where  $\text{TV}(P_Y^A, P_Y^B)$  is the total variation distance between two distribution  $P_Y^A$  and  $P_Y^B$ .

902 This matching probability is not as strong, compared to PML as well as IML, details in Appendix  
 903 C.2<sup>1</sup>. In the case of GRS, we provide an analysis via a non-trivial example in Appendix D.2,  
 904 where we demonstrate that it is possible to construct target and proposal distributions such that  
 905  $\Pr(K_A = K_B | Y_{K_A} = y) \rightarrow 0.0$ , even when  $P_Y^A(y) = P_Y^B(y)$ . In contrast, this probability is greater  
 906 than  $1/4$  for standard RS. In summary, while GRS and RS can achieve a coding cost in (1), its  
 907 matching probability remains lower than that attainable by PML and IML.

### 908 C.1.1 Proof.

909 We denote by  $K_A, K_B$  the index selected by parties  $A$  and  $B$ , respectively. We first note that the  
 910 event  $\{K_A = K_B = i, Y_i = y\}$  is equivalent to the event  $\{K_A = K_B = i, Y_{K_A} = y\}$ , thus:

$$\Pr(K_A = K_B = i | Y_{K_A} = y) = \frac{\Pr(K_A = K_B = i | Y_i = y) Q_Y(y)}{P_Y^A(y)}, \quad (96)$$

911 where the denominator is due to  $Y_{K_A} \sim P_Y^A(\cdot)$ . Since:

$$\Pr(K_A = K_B | Y_{K_A} = y) = \sum_{i=1}^{\infty} \Pr(K_A = K_B = i | Y_{K_A} = y) \quad (97)$$

$$= \frac{Q_Y(y)}{P_Y^A(y)} \sum_{i=1}^{\infty} \Pr(K_A = K_B = i | Y_i = y) \quad (98)$$

912 We will later show that:

$$\Pr(K_A = K_B = i | Y_i = y) = \frac{\min(P_Y^A(y), P_Y^B(y))}{\omega Q_Y(y)} \left[ 1 - \frac{1}{\omega} \int \max(P_Y^A(y), P_Y^B(y)) dy \right]^{i-1}, \quad (99)$$

913 which gives us:

$$\Pr(K_A = K_B | Y_{K_A} = y) \quad (100)$$

$$= \frac{Q_Y(y)}{P_Y^A(y)} \cdot \frac{\min(P_Y^A(y), P_Y^B(y))}{\omega Q_Y(y)} \sum_{i=1}^{\infty} \left[ 1 - \frac{1}{\omega} \int \max(P_Y^A(y), P_Y^B(y)) dy \right]^{i-1} \quad (101)$$

$$= \frac{\min(P_Y^A(y), P_Y^B(y))}{\omega P_Y^A(y)} \sum_{i=0}^{\infty} \left[ 1 - \frac{1}{\omega} \int \max(P_Y^A(y), P_Y^B(y)) dy \right]^i \quad (102)$$

$$= \frac{\min(P_Y^A(y), P_Y^B(y))}{\omega P_Y^A(y)} \frac{\omega}{\int \max(P_Y^A(y), P_Y^B(y)) dy} \quad (103)$$

$$= \frac{\min(1, P_Y^B(y)/P_Y^A(y))}{\int \max(P_Y^A(y), P_Y^B(y)) dy} \quad (104)$$

$$= \frac{\min(1, P_Y^B(y)/P_Y^A(y))}{1 + \text{TV}(P_Y^A, P_Y^B)}, \quad (105)$$

914 where  $\text{TV}(P_Y^A, P_Y^B)$  is the total variation distance between  $P_Y^A(\cdot)$  and  $P_Y^B(\cdot)$ . Using the inequality  
 915  $\min(u, v) \geq \frac{uv}{u+v}$  and the fact that  $\text{TV}(P_Y^A, P_Y^B) \leq 1$  gives us the latter inequality.

<sup>1</sup>Daliri et al. [7] also arrives to a similar conclusion but for discrete case, targeting a different problem.

916 To show (99), we first compute the following probabilities where  $A$  and  $B$  both accept/terminate a  
 917 given sample  $Y = y$ :

$$\gamma(y) = \Pr(A \text{ and } B \text{ accepts } Y | Y = y) \quad (106)$$

$$= \Pr(U \leq \min(P_Y^A(y), P_Y^B(y)) | Y = y) \quad (107)$$

$$= \frac{\min(P_Y^A(y), P_Y^B(y))}{\omega Q_Y(y)} \quad (108)$$

918 and,

$$\hat{\gamma}(y) = \Pr(A \text{ and } B \text{ rejects } Y | Y = y) \quad (109)$$

$$= \Pr(U > \max(P_Y^A(y), P_Y^B(y)) | Y = y) \quad (110)$$

$$= 1 - \frac{\max(P_Y^A(y), P_Y^B(y))}{\omega Q_Y(y)} \quad (111)$$

919 Then we have:

$$\Pr(K_A = K_B = i | Y_i = y_i) \quad (112)$$

$$= \int \Pr(K_A = K_B = i | Y_{1:i} = y_{1:i}) Q_Y(Y_{1:i-1} = y_{1:i-1} | Y_i = y) dy_{1:i-1} \quad (113)$$

$$= \int \Pr(K_A = K_B = i | Y_{1:i} = y_{1:i}) Q_Y(Y_{1:i-1} = y_{1:i-1}) dy_{1:i-1} \quad (114)$$

$$= \int \Pr(K_A = K_B = i | Y_{1:i} = y_{1:i}) Q_Y(Y_{1:i-1} = y_{1:i-1}) dy_{1:i-1} \quad (115)$$

$$= \gamma(y_i) \int \prod_{j=1}^{i-1} \hat{\gamma}(y_j) Q_Y(y_j) dy_{1:i-1} \quad (116)$$

$$= \gamma(y_i) \prod_{j=1}^{i-1} \int \hat{\gamma}(y) Q_Y(y) dy \quad (117)$$

$$= \frac{\min(P_Y^A(y), P_Y^B(y))}{\omega Q_Y(y)} \left[ \int \left( 1 - \frac{\max(P_Y^A(y), P_Y^B(y))}{\omega Q_Y(y)} \right) Q_Y(y) dy \right]^{i-1} \quad (118)$$

$$= \frac{\min(P_Y^A(y), P_Y^B(y))}{\omega Q_Y(y)} \left[ 1 - \frac{1}{\omega} \int \max(P_Y^A(y), P_Y^B(y)) dy \right]^{i-1} \quad (119)$$

920 Finally, we note that:

$$\Pr(B \text{ outputs } y | A \text{ outputs } y) \quad (120)$$

$$= \Pr(K_B = K_A | Y_{K_{P_A}=y}) + \Pr(\text{party } B \text{ outputs } y, K_B \neq K_A | Y_{K_A=y}) \quad (121)$$

921 Finally, note that in the case where  $P_A(\cdot), P_B(\cdot)$  are continuous distribution, we have:

$$\Pr(\text{party } B \text{ outputs } y, K_{P_B} \neq K_{P_A} | Y_{K_{P_A}=y}) = 0.0 \quad (122)$$

922 This completes the proof.

## 923 C.2 Comparision with Poisson Matching Lemma

924 We will compare the average matching probability  $\Pr(K_A = K_B)$  between RS and PML in the  
 925 continuous case. Starting from equation (30) in [24] and assume  $P_Y^A(y) \leq P_Y^B(y)$ , we have:

$$P(Y_A = Y_B = y) \quad (123)$$

$$= \Pr(K_A = K_B | Y_A = y) P(Y_A = y) \quad (124)$$

$$= \frac{1}{\int_{-\infty}^{\infty} \max \left\{ \frac{P_Y^A(v)}{P_Y^A(y)}, \frac{P_Y^B(v)}{P_Y^B(y)} \right\} dv} \quad (125)$$

$$= \frac{P_Y^A(y)}{\int_{-\infty}^{\infty} \max \left\{ P_Y^A(v), \frac{P_Y^B(v)}{P_Y^B(y)} P_Y^A(y) \right\} dv} \quad (126)$$

$$\geq \frac{P_Y^A(y)}{\int_{-\infty}^{\infty} \max \{ P_Y^A(v), P_Y^B(v) \} dv} \quad (\text{Since we assume } P_Y^A(y) \leq P_Y^B(y)) \quad (127)$$

$$= \frac{P_Y^A(y)}{1 + \text{TV}(P_Y^A, P_Y^B)} \quad (128)$$

926 Repeating the same step for  $P_Y^A(y) \geq P_Y^B(y)$ , we have:

$$P(Y_A = Y_B = y) \geq \frac{\min(P_Y^A(y), P_Y^B(y))}{1 + \text{TV}(P_Y^A, P_Y^B)} \quad (129)$$

927 Taking the integral with respect to  $y$  for both sides gives us the desired inequality where the RHS  
 928 expression is the average matching probability of RS. Finally, the same conclusion holds for IML  
 929 since the matching probability of IML converges to that of PML.

## 930 D Greedy Rejection Sampling.

### 931 D.1 Coding Cost

932 Compared to the standard RS approach described above, GRS is a more well-known tool for channel  
 933 simulation [12, 16], as its runtime entropy, i.e.,  $H[K]$ , is significantly lower than that of standard RS.  
 934 Unlike standard RS, where the acceptance probability remains the same on average at each step, GRS  
 935 greedily accepts samples from high-density regions as early as possible (see [12] for more details).  
 936 Using these properties, Flamich and Theis [12] provide the following upper bound on  $H[K]$ , which  
 937 generalizes the discrete version established by Harsha et al. [16]:

$$H[K] \leq I[X; Y] + \log(I[X; Y] + 1) + 4, \quad (130)$$

938 which has a smaller constant compared to the bound for standard RS. We conclude with a note on the  
 939 coding cost of GRS, highlighting that, unlike standard RS, which is relatively easy to implement in  
 940 practice, GRS can be more challenging to deploy as it requires repeatedly computing a complex and  
 941 potentially intractable integral.

### 942 D.2 Matching Probability in Greedy Rejection Sampling

943 **Setup.** Let the proposal distribution  $Q_Y$  be a discrete uniform  $\text{Unif}[1, n]$ , i.e.  $Q_Y(y) = q = 1/n$  and  
 944  $U \sim \mathcal{U}(0, 1)$  as in standard RS. Then, we define  $W$  as follow:

$$W = \{(Y_1, U_1), (Y_2, U_2), \dots\} \quad (131)$$

945 Our goal is to show that, for this proposal distribution  $Q_Y$ , there exists the target distributions  
 946  $P_Y^A(\cdot)$  and  $P_Y^B(\cdot)$  such that the GRS matching probability  $\Pr(Y_A = Y_B | Y_A = y) \rightarrow 0.0$  even when  
 947  $P_Y^A(y) = P_Y^B(y)$ . Let  $n = 2k + 1$ , we construct the following  $P_Y^A$  and  $P_Y^B$ :

$$P_Y^A(Y = 1) = \frac{k+1}{2k+1}, \quad P_Y^A(Y = i) = \begin{cases} \frac{1}{2k+1}, & \text{for } 1 < i \leq k+1 \\ 0.0, & \text{for } i > k+1 \end{cases}, \quad (132)$$

$$P_Y^B(Y = 1) = \frac{k+1}{2k+1}, \quad P_Y^B(Y = i) = \begin{cases} \frac{1}{2k+1}, & \text{for } i > k+1 \\ 0.0, & \text{for } 1 < i \leq k+1 \end{cases}, \quad (133)$$

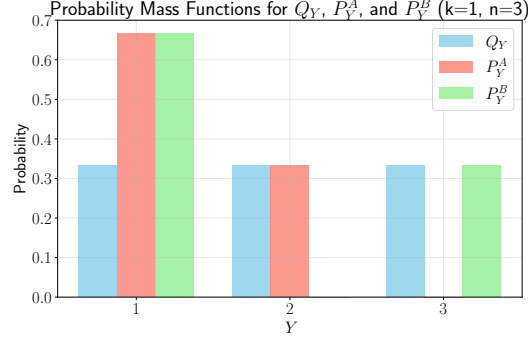

Figure 8: Visualization of example distributions in Section D.2 for  $k = 1$ .

where we visualize this in Figure 8.

**GRS Matching Probability.** Given party  $A$  has target distribution  $P_Y^A(\cdot)$  and party  $B$  has target distribution  $P_Y^B(\cdot)$ , with each running the GRS procedure to obtain their samples  $Y_A, Y_B$  respectively. We want to characterize the probability that party  $A$  and party  $B$  outputs the same value, give party  $A$ 's output. We denote  $K_A$  and  $K_B$  as the index within  $W$  that party  $A$  and party  $B$  select respectively, i.e.,  $Y_{K_A} = Y_A$  and  $Y_{K_B} = Y_B$ .

Consider the event  $Y_A = 1$ , with the construction above, we have the following properties:

- If party  $A$  and party  $B$  both see the first proposal  $Y_1 = 1$ , they will greedily accept it, since  $P_Y^A(Y = 1) = P_Y^B(Y = 1) \geq Q_Y(Y = 1)$ . So in this case:

$$\Pr(K_A = K_B = 1, Y_A = 1) = Q_Y(Y = 1) = \frac{1}{2k + 1}$$

- On the other hand, if the first proposal  $Y_1 \neq 1$  then either party  $A$  or  $B$  must accept and output  $Y_1 \neq 1$  since for  $y \neq 1$ , the probability distribution complement each other and equal to  $Q_Y(y) = \frac{1}{2k+1}$ . For example, for  $n = 3$  and  $Y_2 = 2$ , then party  $A$  will accept it while party  $B$  must reject it. Therefore, we have:

$$\Pr(K_A = K_B > 1, Y_A = 1) = 0.0.$$

- Finally, from the previous analysis, for any positive integers  $i \neq j$ , we have

$$\Pr(K_A = i, K_B = j, Y_A = 1, Y_B = 1) = 0.0,$$

Indeed, consider  $i = 1$  then  $\Pr(K_A = 1, K_B = j, Y_A = 1, Y_B = 1) = 0.0$  since both of them must accept the first proposal  $Y_1 = 1$ . On the other hand, if  $i > 1$  then we must have  $j = 1$  since we know that  $Y_1 \neq 1$  in this case and thus one of the party must stop. Since  $i > 1$ , it has to be party  $B$  and in this case,  $Y_B \neq 1$ .

For this reason, we have:

$$\Pr(Y_A = Y_B = 1) \tag{134}$$

$$= \Pr(K_A = K_B, Y_A = 1, Y_B = 1) + \Pr(K_A \neq K_B, Y_A = 1, Y_B = 1) \tag{135}$$

$$= \Pr(K_A = K_B, Y_A = 1) + \sum_{i \neq j} \Pr(K_A = i, K_B = j, Y_A = 1, Y_B = 1) \tag{136}$$

$$= \Pr(K_A = K_B, Y_A = 1) \tag{137}$$

$$= \Pr(K_A = K_B = 1, Y_A = 1) + \Pr(K_A = K_B > 1, Y_A = 1) \tag{138}$$

$$= Q_Y(Y = 1) \tag{139}$$

$$= \frac{1}{2k + 1} \tag{140}$$

and hence:

$$\Pr(Y_A = Y_B | Y_A = 1) = \frac{1}{k + 1} \tag{141}$$

961 which approaches 0.0 as  $n \rightarrow \infty$ . Overall, due to its greedy selection approach, GRS may yield  
 962 lower matching probabilities compared to other methods such as PML which we provide the analysis  
 963 below.

964 **Matching Probability of PML.** In PML, the matching probability is  $\Pr(Y_A = Y_B \mid Y_A = 1) = 1$ .  
 965 This results from PML's more global selection process compared to GRS, as it evaluates all candidates  
 966 comprehensively. In particular, let  $W = (S_1, Y_1), \dots, (S_n, Y_n)$  where  $S_i \sim \text{Exp}(1)$  and let  $K_A, K_B$   
 967 be the value within  $W$  that each party respectively select in this case. Note that the construction of  
 968  $W$  in the discrete case for PML does not require  $Q_Y$ . The selection process according to PML is as  
 969 follows:

$$K_A = \arg \min_{1 \leq i \leq n} \frac{S_i}{P_Y^A(Y_i)} \quad K_B = \arg \min_{1 \leq i \leq n} \frac{S_i}{P_Y^B(Y_i)}, \quad (142)$$

970 and each party outputs  $Y_A = Y_{K_A}, Y_B = Y_{K_B}$ . We see that if  $K_A = 1$ , then we must have  
 971  $K_B = 1$ . This is because for any  $i > 1$ , we have  $P_Y^A(Y = 1) = P_Y^B(Y = 1) > P_Y^B(Y = i)$  and  
 972  $P_Y^A(Y = i) = P_Y^B(Y = i + 1 + k)$ . Thus, this gives  $\Pr(Y_A = Y_B \mid Y_A = 1) = 1$ .

---

**Algorithm 1:** Ensemble Rejection Sampling - ERS( $W; P_Y, Q_Y, \omega = \max_y \frac{P_Y(y)}{Q_Y(y)}, \text{scale} = 1$ )

---

**Input:** Target distribution  $P_Y$ , Proposal distribution  $Q_Y$ , and the source of randomness  $W$  (see Section 5.1). Default value  $\omega = \max_y \frac{P_Y(y)}{Q_Y(y)}$  unless override by some value  $> \omega$ .

Default scaling factor  $\text{scale} = 1$  unless override by some value within  $(0, 1]$ .

**Output:** Selected Index  $K$  and sample  $Y_K \sim P_Y$

1. Observe batch  $\{B_i, U_i\}$
2. Select candidate index  $K_i^{\text{cand}}$ :

$$K_i^{\text{cand}} = \underset{1 \leq k \leq N}{\operatorname{argmin}} \frac{S_{ik}}{\lambda_{ik}}, \quad \text{where: } \lambda_{ik} = \frac{P_Y(Y_{ik})}{Q_Y(Y_{ik})}$$

3. Compute:

$$\hat{Z}(Y_{i,1:N}) = \sum_{k=1}^N \lambda_{ik}, \quad \bar{Z}(Y_{i,1:N}, K_i^{\text{cand}}) = \hat{Z}(Y_{i,1:N}) + \omega - \lambda_{i, K_i^{\text{cand}}}$$

4. Set  $K_1 = i$ ,  $K_2 = K_i^{\text{cand}}$ ,  $K = (N-1)i + K_i^{\text{cand}}$  and return  $Y_K$  if:

$$U_i \leq \frac{\hat{Z}(Y_{i,1:N})}{\bar{Z}(Y_{i,1:N}, K_i^{\text{cand}})} \cdot \text{scale},$$

else repeat Step 1 with  $B_{i+1}$ .

---

## 973 E ERS Coding Scheme

### 974 E.1 Preliminaries

975 We show the standard ERS algorithm in Algorithm 1, following the original version introduced by  
 976 Deligiannidis et al. [8] with a slight generalization in terms of the scaling factor ( $0 < \text{scale} \leq 1$ )  
 977 that we will use for channel simulation purpose. This section begins by establishing some detailed  
 978 quantities that will be used repeatedly. For simplicity, we use  $P_x(\cdot)$  for the target distribution  $P_{Y|X=x}$   
 979 and  $Q(\cdot)$  for the proposal distribution. Let  $\omega_x = \max_y P_x(y)/Q(y)$ , we define the quantities:

$$\hat{Z}_x(y_{1:N}) = \sum_{j=1}^N \frac{P_x(y_j)}{Q(y_j)}, \quad \bar{Z}_x(y_{1:N}, k) = \hat{Z}_x(y_{1:N}) - \frac{P_x(y_k)}{Q(y_k)} + \omega_x \quad (143)$$

980 and denote the following constants:

$$\Delta_x = \mathbb{E}_{Y_{1:N} \sim Q} \left[ \frac{N}{\bar{Z}_x(Y_{1:N}, 1)} \right], \quad \Delta = \frac{N}{N-1+\omega}, \quad (144)$$

981 where we recall that  $\omega = \max_{x,y} P_x(y)/Q(y)$ , by Jensen's inequality we have the following:

$$\Delta_x \geq \frac{N}{N-1+\omega_x} \geq \frac{N}{N-1+\omega} = \Delta \text{ for every } x. \quad (145)$$

982 From this, we can see that as  $N \rightarrow \infty$ , we achieve  $\Delta \rightarrow 1.0$ . This value  $\Delta$  turns out to be the average  
 983 batch acceptance probability when we set  $\text{scale} = \frac{\Delta}{\Delta_x}$ , which we elaborate on below.

984 **Scaled Acceptance Probability.** For the channel simulation setting in this section, we slightly modify  
 985 the acceptance probability in Algorithm 1 (step 4) with a scaling factor  $\text{scale} = \frac{\Delta}{\Delta_x} \leq 1$  such that  
 986 the average batch acceptance probability is the same, regardless of the target distribution  $P_x$ <sup>2</sup>. In  
 987 particular, the encoder selects the index according to:

$$K = \text{ERS}(W; P_x, Q, \text{scale} = \frac{\Delta}{\Delta_x}), \quad (146)$$

---

<sup>2</sup>This is similar to the case of standard RS where we accept/reject based on the global ratio bound  $\omega$  instead of  $\omega_x$ .

988 which means for a batch  $i$  containing samples  $Y_{i,1:N} = y_{1:N}$ , we accept it within step 4 if:

$$\text{Accept if } U_i \leq \frac{\hat{Z}_x(y_{1:N})}{\bar{Z}_x(y_{1:N}, k)} \frac{\Delta}{\Delta_x}, \quad (147)$$

989 where we modify the scaling scale  $= \frac{\Delta}{\Delta_x} \leq 1$  in Algorithm 1, which is a constant and does not  
 990 affect the resulting output distribution. The value of  $k$  is determined via the Gumbel-Max selection  
 991 procedure in Step 2. The intuition is, within every accepted batch without scaling, we randomly reject  
 992  $(1 - \text{scale})$  of them. Formally, first consider the following **ERS proposal distribution**:

$$\bar{Q}_{Y_{1:N}, K}(y_{1:N}, k; x) = \left( \frac{P_x(y_k)/Q(y_k)}{\sum_{j=1}^N P_x(y_j)/Q(y_j)} \right) \prod_{j=1}^N Q(y_j) \quad (148)$$

$$= \left( \frac{P_x(y_k)/Q(y_k)}{\hat{Z}_x(y_{1:N})} \right) \prod_{j=1}^N Q(y_j), \quad (149)$$

993 where the first product in the RHS is the likelihood we obtain the samples  $y_{1:N}$  from the original  
 994 proposal distribution  $Q_Y(\cdot)$  and the ratio is due to the IS process. Now, the **ERS target distribution**  
 995 is  $\bar{P}_{Y_{1:N}, K}(y_{1:N}, k; x)$  where

$$\bar{P}_{Y_{1:N}, K}(y_{1:N}, k; x) = \frac{1}{\alpha} \left( \frac{P_x(y_k)/Q(y_k)}{\hat{Z}_x(y_{1:N})} \frac{\hat{Z}_x(y_{1:N})}{\bar{Z}_x(y_{1:N}, k)} \frac{\Delta}{\Delta_x} \right) \prod_{j=1}^N Q(y_j) \quad (150)$$

$$= \left( \frac{P_x(y_k)/Q(y_k)}{\Delta_x \bar{Z}_x(y_{1:N}, k)} \right) \prod_{j=1}^N Q(y_j), \quad (151)$$

996 which is the batch target distribution that yields  $Y \sim P_x$  when no scaling occur (see [8], Section 2.2),  
 997 since the normalization factor  $\alpha$  is:

$$\alpha = \sum_{k=1}^N \int_{-\infty}^{\infty} \left( \frac{P_x(y_k)/Q(y_k)}{\bar{Z}_x(y_{1:N}, k)} \right) \frac{\Delta}{\Delta_x} \left( \prod_{j=1}^N Q(y_j) \right) dy_{1:N} \quad (152)$$

$$= N \frac{\Delta}{\Delta_x} \int_{-\infty}^{\infty} \left( \frac{P_x(y_k)/Q(y_k)}{\bar{Z}_x(y_{1:N}, 1)} \right) \left( \prod_{j=1}^N Q(y_j) \right) dy_{1:N} \quad (\text{Due to symmetry}) \quad (153)$$

$$= N \frac{\Delta}{\Delta_x} \int_{-\infty}^{\infty} \frac{1}{\bar{Z}_x(y_{1:N}, 1)} \left( \prod_{j=2}^N Q(y_j) \right) dy_2^N \quad (154)$$

$$= \Delta \quad (155)$$

998 It turns out that  $\Delta$  is also the **batch acceptance probability** since:

$$\Pr(\text{Accept batch } B) = \mathbb{E}_{(Y_{1:N}, K) \sim \bar{Q}} \left[ \frac{\Delta}{\Delta_x} \frac{\hat{Z}_x(y_{1:N})}{\bar{Z}_x(y_{1:N}, k)} \right] \quad (156)$$

$$= \frac{\Delta}{\Delta_x} \sum_{k=1}^N \int_{-\infty}^{\infty} \left( \frac{P_x(y_k)/Q(y_k)}{\bar{Z}_x(y_{1:N}, k)} \right) \quad (157)$$

$$= \frac{\Delta}{\Delta_x} N \int_{-\infty}^{\infty} \left( \frac{P_x(y_1)/Q(y_1)}{\bar{Z}_x(y_{1:N}, 1)} \right) \left( \prod_{j=1}^N Q(y_j) \right) dy_{1:N} \quad (158)$$

$$= \Delta, \quad (159)$$

999 and it can be observed that, without the scaling factor  $\frac{\Delta}{\Delta_x}$ , the batch acceptance probability is  $\Delta_x$ .

1000 Finally, we can view the ERS as a standard RS procedure with proposal distribution  $\bar{Q}_{Y_{1:N}, K}$  and  
 1001 target distribution  $\bar{P}_{Y_{1:N}, K}$ .

1002 **Harris-FKG/Chebyshev Inequality.** We introduce the following inequality (Harris-  
 1003 FKG/Chebyshev), which will be used in the proof:

1004 **Proposition E.1.** For function  $f, g$  on  $Y \sim P(\cdot)$  where  $f$  is non-increasing and  $g$  is non-decreasing,  
 1005 we have:

$$\mathbb{E}[f(Y)g(Y)] \leq \mathbb{E}[f(Y)]\mathbb{E}[g(Y)]$$

1006 *Proof.* Let  $Y_1, Y_2 \sim P(\cdot)$  and they are independent. Then we have:

$$[f(Y_1) - f(Y_2)][g(Y_1) - g(Y_2)] \leq 0 \quad (160)$$

1007 Hence:

$$\mathbb{E}\{[f(Y_1) - f(Y_2)][g(Y_1) - g(Y_2)]\} \leq 0 \quad (161)$$

1008 This gives us:

$$\mathbb{E}[f(Y_1)g(Y_1)] + \mathbb{E}[f(Y_2)g(Y_2)] \leq \mathbb{E}[f(Y_1)]\mathbb{E}[g(Y_2)] + \mathbb{E}[f(Y_2)]\mathbb{E}[g(Y_1)], \quad (162)$$

1009 which completes the proof.  $\square$

## 1010 E.2 Encoding $K_1$ .

1011 We encode  $K_1$  the same way as the scheme for standard RS. Similar to standard RS, we encode  $K_1$   
 1012 into two messages. Specifically:

- 1013 • Step 1: the encoder sends the ceiling  $L = \lceil \frac{K_1}{\lfloor \Delta^{-1} \rfloor} \rceil$  to the decoder. The decoder then knows  
 1014  $(L-1)\lfloor \Delta^{-1} \rfloor^{-1} + 1 \leq L \leq L\lfloor \Delta^{-1} \rfloor^{-1}$ , i.e.  $K_1$  is in chunk  $L$  that consists of  $\lfloor \Delta^{-1} \rfloor^{-1}$   
 1015 batches. We have  $\mathbb{E}[\log(L)] \leq 1$  bit.
- 1016 • Step 2: The encoder and decoder both sort the uniform random variables  $U_i$  within the  
 1017 selected chunk  $(L-1)\lfloor \Delta^{-1} \rfloor^{-1} + 1 \leq i \leq L\lfloor \Delta^{-1} \rfloor^{-1}$ . Let the sorted list be  $U_{\pi(1)} \leq$   
 1018  $U_{\pi(2)} \leq \dots \leq U_{\pi(\lfloor \Delta^{-1} \rfloor)}$  where  $\pi(\cdot)$  is the mapping between the sorted index and the  
 1019 original unsorted one. The encoder sends the rank of  $U_{K_1}$  within this list, i.e. sends the  
 1020 value  $T$  such that  $K_1 = \pi(\hat{K}_1)$ . The decoder receive  $\hat{K}_1$  and retrieve  $B_{K_1}$  accordingly.  
 1021 Section E.2.2 shows the coding cost for this step.

1022 We provide the detail analysis in Section E.2.1 and E.2.2. Notice that the role  $\Delta$  plays here is similar  
 1023 to that of  $\omega$  in standard RS.

### 1024 E.2.1 Coding Cost of $L$

Similar to RS, since each batch is accepted with probability  $\Delta$  (see (159)), this means:

$$\Pr(K_1 > \ell \Delta^{-1}) = (1 - \Delta)^{\ell \lfloor \Delta^{-1} \rfloor} < 0.5^{-\ell},$$

1025 which is equivalent to  $\Pr(L > \ell) < 0.5^{-\ell}$ . Note that we reuse the inequality in Appendix B.3. We  
 1026 have:

$$\mathbb{E}[L] = \sum_{\ell=0}^{\infty} \Pr(L > \ell) < 1 + 0.5^{-1} + 0.5^{-2} + \dots = 2, \quad (163)$$

1027 implying  $\mathbb{E}[\log L] \leq 1$ .

### 1028 E.2.2 Coding Cost of $\hat{K}_1$

1029 We will show that:

$$\mathbb{E}[\log \hat{K}_1] \leq \frac{N}{\Delta_x} \mathbb{E}_{Y_{1:N} \sim Q} \left[ \frac{P_x(Y_1)/Q(Y_1)}{\bar{Z}_x(Y_{1:N}, 1)} \log \left( \frac{\hat{Z}_x(Y_{1:N})}{\Delta_x \bar{Z}_x(Y_{1:N}, 1)} \right) \right], \quad (164)$$

1030 where we provide the result of (164) in Section E.4.2.

### 1031 E.3 Encoding $K_2$ .

1032 Given an accepted batch  $\{(Y_i, S_i)\}_{i=1}^N$ , we have:

$$K_2 = \arg \min_{1 \leq i \leq N} \frac{S_i}{\lambda_i}; \quad \Theta_P = \min_{1 \leq i \leq N} \frac{S_i}{\lambda_i}, \quad (165)$$

1033 where we have the weights  $\lambda_i$  defined as:

$$\lambda_i = \frac{P(Y_i)}{Q(Y_i)} \quad (166)$$

1034 After communicating the selected batch index  $K_1$ , the encoder and decoder sort the exponential  
1035 random variables  $\{S_{K_1, i}\}_{i=1}^N$ , i.e.

$$S_{K_2, \pi(1)} \leq S_{K_2, \pi(2)} \leq \dots \leq S_{K_2, \pi(N)}, \quad (167)$$

and send the sorted index  $\hat{K}_2$  of  $K_2$ , i.e.  $\pi(\hat{K}_2) = K_2$ . The decoder also performs the sorting operation and retrieve  $K_2$  accordingly. Since  $K_2$  are obtained from the batch selected by ERS, we analyze  $\mathbb{E}[\log \hat{K}_2' | Y_{1:N} \text{ are selected}]$ , where  $\hat{K}_2'$  and  $K_2'$  are defined the same as  $\hat{K}_2$  and  $K_2$  (follows the same Gumbel-Max procedure) but for arbitrary  $N$  i.i.d. proposals  $Y_{1:N} \sim Q(\cdot)$ . In this case:

$$\mathbb{E}[\log \hat{K}_2] = \mathbb{E}[\log \hat{K}_2' | Y_{1:N} \text{ are selected}]$$

Notice the following identity:

$$\bar{P}(y_{1:N}, k_2; x) = P(Y_{1:N} = y_{1:N} | Y_{1:N} \text{ are selected}, K_2' = k_2) \Pr(K_2' = k_2 | Y_{1:N} \text{ are selected})$$

1036 where  $\bar{P}(y_{1:N}, k_2; x)$  is the ERS target distribution described previously in Appendix E.1. Then, we  
1037 obtain the following likelihood:

$$P(Y_{1:N} = y_{1:N} | Y_{1:N} \text{ are selected}, K_2' = 1) \quad (168)$$

$$= \frac{\bar{P}(y_{1:N}, j; x)}{\Pr(K_2' = 1 | Y_{1:N} \text{ are selected})} \quad (169)$$

$$= N \frac{P_x(y_1)/Q(y_1)}{\Delta_x \bar{Z}_x(y_{1:N}, 1)} \prod_{i=1}^N Q(y_i) \quad (170)$$

1038 With this, we now bound the expectation term of interest  $\mathbb{E}[\log \hat{K}_2]$  as follows:

$$\mathbb{E}[\log \hat{K}_2] \quad (171)$$

$$= \mathbb{E}[\log \hat{K}_2' | Y_{1:N} \text{ are selected}] \quad (172)$$

$$= \mathbb{E}[\log \hat{K}_2' | Y_{1:N} \text{ are selected}, K_2' = 1] \quad (\text{Due to Symmetry}) \quad (173)$$

$$= \mathbb{E}_{Y_{1:N}}[\mathbb{E}[\log \hat{K}_2' | Y_{1:N} \text{ are selected}, K_2' = 1, Y_{1:N} = y_{1:N}]] \quad (174)$$

$$= N \int_{-\infty}^{\infty} \frac{P_x(y_1)/Q(y_1)}{\Delta_x \bar{Z}_x(y_{1:N}, 1)} \mathbb{E}[\log \hat{K}_2' | Y_{1:N} \text{ are selected}, Y_{1:N} = y_{1:N}, K_2' = 1] \left( \prod_{i=1}^N Q(y_i) \right) dy_{1:N} \quad (175)$$

$$= N \int_{-\infty}^{\infty} \frac{P_x(y_1)/Q(y_1)}{\Delta_x \bar{Z}_x(y_{1:N}, 1)} \mathbb{E}[\log \hat{K}_2' | Y_{1:N} = y_{1:N}, K_2' = 1] \left( \prod_{i=1}^N Q(y_i) \right) dy_{1:N}, \quad (176)$$

1039 where the last equality is because, given  $\{Y_{1:N}=y_{1:N}, K_2'=1\}$ , the event  $\{Y_{1:N} \text{ are selected}\}$  and the  
1040 random variable  $\hat{K}_2'$  are independent. In particular, the decision whether to accept a batch or not does  
1041 not depends on the rank of  $S_{K_2'}$ , that is:

$$\Pr(Y_{1:N} \text{ are selected} | Y_{1:N} = y_{1:N}, K_2' = 1, \hat{K}_2' = k_2) \quad (177)$$

$$= \Pr(Y_{1:N} \text{ are selected} | Y_{1:N} = y_{1:N}, K_2' = 1) \quad (178)$$

$$= \frac{\hat{Z}_x(y_{1:N})}{\bar{Z}_x(y_{1:N}, 1)} \frac{\Delta}{\Delta_x} \quad (179)$$

1042 We then have:

$$\mathbb{E}[\log \hat{K}'_2 | Y_{1:N} \text{ are selected}] \quad (180)$$

$$= N \int_{-\infty}^{\infty} \prod_{i=1}^N Q(y_i) \frac{P_x(y_1)/Q(y_1)}{\Delta_x \hat{Z}_x(y_{1:N}, 1)} \left( \int_0^{\infty} e^{-\theta} \mathbb{E}[\log \hat{K}'_2 | Y_{1:N}=y_{1:N}, K'_2=1, \Theta_P=\theta] d\theta \right) dy_{1:N}, \quad (181)$$

1043 since, given  $Y_{1:N}$ ,  $\Theta_P$  is independent of  $K'_2$  and  $\Theta_P \sim \text{Exp}(1)$  (see [32], Appendix 18). We now provide an upperbound of  $\mathbb{E}[\log \hat{K}'_2 | Y_{1:N}=y_{1:N}, K'_2=1, \Theta_P=\theta]$ , which follows the argument presented in [32], and is repeated here. Applying Jensen's inequality, we have:

$$\mathbb{E}[\log \hat{K}'_2 | Y_{1:N} = y_{1:N}, K'_2 = 1, \Theta_P = \theta] \leq \log \mathbb{E}[\hat{K}'_2 | Y_{1:N} = y_{1:N}, K'_2 = 1, \Theta_P = \theta], \quad (182)$$

1046 We then rewrite  $\hat{K}'_2$  as the following:

$$\hat{K}'_2 = |\{S_i < S_{K'_2}\}| + 1, \quad (183)$$

1047 which gives us:

$$\mathbb{E}[\hat{K}'_2 | Y_{1:N} = y_{1:N}, K'_2 = 1, \Theta_P = \theta] \quad (184)$$

$$= 1 + \mathbb{E}[|\{S_i < S_{K'_2}\}| | Y_{1:N} = y_{1:N}, K'_2 = 1, \Theta_P = \theta] \quad (185)$$

$$= 1 + \mathbb{E} \left[ \left| \left\{ S_i < \theta \frac{P_x(Y_{K'_2})/Q(Y_{K'_2})}{\hat{Z}_x(Y_{1:N})} \right\} \right| \middle| Y_{1:N} = y_{1:N}, K'_2 = 1, \Theta_P = \theta \right] \quad (186)$$

$$= 1 + \sum_{i=2}^N \Pr \left( S_i < \theta \frac{P_x(Y_{K'_2})/Q(Y_{K'_2})}{\hat{Z}_x(Y_{1:N})} \middle| Y_{1:N} = y_{1:N}, K'_2 = 1, \Theta_P = \theta \right) \quad (187)$$

$$= 1 + \sum_{i=2}^N \Pr \left( S_i < \theta \frac{P_x(Y_1)/Q(Y_1)}{\hat{Z}_x(Y_{1:N})} \middle| Y_{1:N} = y_{1:N}, \frac{S_j}{\frac{P_x(y_j)/Q(y_j)}{\hat{Z}_x(y_{1:N})}} \geq \theta \text{ for } j \neq 1, \frac{S_1}{\frac{P_x(y_1)/Q(y_1)}{\hat{Z}_x(y_{1:N})}} = \theta \right) \quad (188)$$

$$= 1 + \sum_{i=2}^N \Pr \left( S_i < \theta \frac{P_x(Y_1)/Q(Y_1)}{\hat{Z}_x(Y_{1:N})} \middle| Y_{1:N} = y_{1:N}, \frac{S_j}{\frac{P_x(y_j)/Q(y_j)}{\hat{Z}_x(y_{1:N})}} \geq \theta \text{ for } j \neq 1, \frac{S_1}{\frac{P_x(y_1)/Q(y_1)}{\hat{Z}_x(y_{1:N})}} = \theta \right) \quad (189)$$

$$= 1 + \sum_{i=2}^N \Pr \left( S_i < \theta \frac{P_x(Y_1)/Q(Y_1)}{\hat{Z}_x(Y_{1:N})} \middle| Y_{1:N} = y_{1:N}, \frac{S_i}{\frac{P_x(y_i)/Q(y_i)}{\hat{Z}_x(y_{1:N})}} \geq \theta \right) \quad (190)$$

1048 Note that:

$$\Pr \left( S_i < \theta \frac{P_x(Y_1)/Q(Y_1)}{\hat{Z}_x(y_{1:N})} \middle| Y_{1:N} = y_{1:N}, \frac{S_i}{\frac{P_x(y_i)/Q(y_i)}{\hat{Z}_x(y_{1:N})}} \geq \theta \right) \quad (191)$$

$$= \mathbf{1} \left\{ \theta \frac{P_x(Y_1)/Q(Y_1)}{\hat{Z}_x(y_{1:N})} \geq \theta \frac{P_x(Y_i)/Q(Y_i)}{\hat{Z}_x(y_{1:N})} \right\} \left[ 1 - \exp \left( -\theta \frac{P_x(y_1)/Q(y_1) - P_x(y_i)/Q(y_i)}{\hat{Z}_x(y_{1:N})} \right) \right] \quad (192)$$

$$\leq 1 - \exp \left( -\theta \frac{P_x(y_1)/Q(y_1) - P_x(y_i)/Q(y_i)}{\hat{Z}_x(y_{1:N})} \right) \quad (193)$$

$$\leq \frac{\theta [P_x(y_1)/Q(y_1) - P_x(y_i)/Q(y_i)]}{\hat{Z}_x(y_{1:N})} \quad (194)$$

$$\leq \frac{\theta P_x(y_1)/Q(y_1)}{\hat{Z}_x(y_{1:N})} \quad (195)$$

1049 As such:

$$\mathbb{E}[\hat{K}'_2 | Y_{1:N} = y_{1:N}, K'_2 = 1, \Theta_P = \theta] \leq 1 + \sum_{i=2}^N \frac{\theta P_x(y_1)/Q(y_1)}{\hat{Z}_x(y_{1:N})} \quad (196)$$

$$\leq 1 + \frac{N\theta P_x(y_1)/Q(y_1)}{\hat{Z}_x(y_{1:N})} \quad (197)$$

1050 and thus:

$$\int_0^\infty e^{-\theta} \mathbb{E}[\log K | Y_{1:N} = y_{1:N}, K_2 = 1, \Theta_P = \theta] d\theta \quad (198)$$

$$\leq \int_0^\infty e^{-\theta} \log \left( 1 + \frac{N\theta P_x(y_1)/Q(y_1)}{\hat{Z}_x(y_{1:N})} \right) d\theta \quad (199)$$

$$\leq \log \left( \frac{NP_x(y_1)/Q(y_1)}{\hat{Z}_x(y_{1:N})} + 1 \right), \quad (200)$$

1051 which is due to Jensen's inequality for concave function  $\log(\cdot)$ . Finally, we have:

$$\mathbb{E}[\log \hat{K}_2] \quad (201)$$

$$\leq \mathbb{E}_{Y_{1:N} \sim Q(\cdot)} \left[ \frac{NP_x(Y_1)/Q(Y_1)}{\Delta_x \bar{Z}_x(Y_{1:N}, 1)} \log \left( \frac{NP_x(Y_1)/Q(Y_1)}{\hat{Z}_x(Y_{1:N})} + 1 \right) \right] \quad (202)$$

$$\leq \mathbb{E}_{Y_{1:N} \sim Q(\cdot)} \left[ \frac{NP_x(Y_1)/Q(Y_1)}{\Delta_x \bar{Z}_x(Y_{1:N}, 1)} \log \left( \frac{NP_x(Y_1)/Q(Y_1)}{\hat{Z}_x(Y_{1:N})} \right) + \frac{\log(e) \hat{Z}_x(Y_{1:N})}{NP_x(Y_1)/Q(Y_1)} \frac{NP_x(Y_1)/Q(Y_1)}{\Delta_x \bar{Z}_x(Y_{1:N}, 1)} \right] \quad (203)$$

$$= \mathbb{E}_{Y_{1:N} \sim Q(\cdot)} \left[ \frac{NP_x(Y_1)/Q(Y_1)}{\Delta_x \bar{Z}_x(Y_{1:N}, 1)} \log \left( \frac{NP_x(Y_1)/Q(Y_1)}{\hat{Z}_x(Y_{1:N})} \right) \right] + \log(e) \quad (204)$$

1052 The last inequality is due to the FKG inequality:

$$\mathbb{E}_{Y_{1:N} \sim Q(\cdot)} \left[ \frac{\log(e) \hat{Z}_x(Y_{1:N})}{\Delta_x \bar{Z}_x(Y_{1:N}, 1)} \right] \quad (205)$$

$$= \log(e) \mathbb{E}_{Y_2^N \sim Q(\cdot)} \left[ \left( 1 + \sum_{i=2}^N \frac{P_x(Y_i)}{Q(Y_i)} \right) \left( \frac{1}{\Delta_x \bar{Z}_x(Y_{1:N}, 1)} \right) \right] \quad (206)$$

$$\leq \log(e) \mathbb{E}_{Y_2^N \sim Q(\cdot)} \left[ 1 + \sum_{i=2}^N \frac{P_x(Y_i)}{Q(Y_i)} \right] \mathbb{E}_{Y_2^N \sim Q(\cdot)} \left[ \frac{1}{\Delta_x \bar{Z}_x(Y_{1:N}, 1)} \right] \quad (207)$$

$$= \log(e) \quad (208)$$

1053 So we have the bound on  $\mathbb{E}[\log(\hat{K}_2)]$  as:

$$\mathbb{E}[\log(\hat{K}_2)] \leq \mathbb{E}_{Y_{1:N} \sim Q(\cdot)} \left[ \frac{NP_x(Y_1)/Q(Y_1)}{\Delta_x \bar{Z}_x(Y_{1:N}, 1)} \log \left( \frac{NP_x(Y_1)/Q(Y_1)}{\hat{Z}_x(Y_{1:N})} \right) \right] + \log(e) \quad (209)$$

#### 1054 E.4 Total Coding Cost of $K$

1055 We now provide an upperbound on the total coding cost of  $K$ . We have:

$$H(K|W) = H(L, \hat{K}_1, \hat{K}_2|W) \quad (210)$$

$$\leq H(L|W) + H(\hat{K}_1|W) + H(\hat{K}_2|W) \quad (211)$$

$$\leq H(L) + H(\hat{K}_1) + H(\hat{K}_2) \quad (212)$$

For each of the message, we encode using Zipf distribution. Since  $\mathbb{E}[\log(L)] \leq 1$ , then:

$$H(L) \leq 3$$

1056 For  $H(\hat{K}_1)$ , we have:

$$H(\hat{K}_1) \leq \mathbb{E}_X[\mathbb{E}[\log(\hat{K}_1)]] + \log(\mathbb{E}_X[\mathbb{E}[\log(\hat{K}_1)]] + 1) + 1 \quad (213)$$

1057 and  $H(\hat{K}_2)$ , we have:

$$H(\hat{K}_2) \leq \mathbb{E}_X[\mathbb{E}[\log(\hat{K}_2)]] + \log(\mathbb{E}_X[\mathbb{E}[\log(\hat{K}_2)]] + 1) + 1 \quad (214)$$

1058 and thus we have:

$$H(K|W) \quad (215)$$

$$\leq (\mathbb{E}_X[\mathbb{E}[\log(\hat{K}_1)]] + \mathbb{E}[\log(\hat{K}_2)]) + \log((\mathbb{E}_X[\mathbb{E}[\log(\hat{K}_1)]] + 1)(\mathbb{E}_X[\mathbb{E}[\log(\hat{K}_2)]] + 1)) + 5 \quad (216)$$

1059 By AM-GM inequality, we have:

$$\log((\mathbb{E}_X[\mathbb{E}[\log(\hat{K}_1)]] + 1)(\mathbb{E}_X[\mathbb{E}[\log(\hat{K}_2)]] + 1)) \quad (217)$$

$$\leq \log\left(\frac{1}{4}(\mathbb{E}_X[\mathbb{E}[\log(\hat{K}_1)]] + 1 + \mathbb{E}_X[\mathbb{E}[\log(\hat{K}_2)]] + 1)^2\right) \quad (218)$$

$$= 2\log(\mathbb{E}_X[\mathbb{E}[\log(\hat{K}_1)]] + \mathbb{E}_X[\mathbb{E}[\log(\hat{K}_2)]] + 2) - 2 \quad (219)$$

1060 We will show  $\mathbb{E}[\log(\hat{K}_1)] + \mathbb{E}[\log(\hat{K}_2)] \leq D_{KL}(P_x||Q) + 3 + 2\log(e)$  at the end of this section.

1061 Given this, we have:

$$H(K|W) \leq I(X; Y) + 3 + 2\log(e) + 2\log(I(X; Y) + 5 + 2\log(e)) - 2 + 5 \quad (220)$$

$$\leq I(X; Y) + 2\log(I(X; Y) + 8) + 9. \quad (221)$$

1062 Since we are encoding 3 messages separately, we add 1 bit overhead for each message and thus arrive  
1063 to the constant 12 as in the original result.

1064 The rest is to bound  $\mathbb{E}[\log(\hat{K}_1)] + \mathbb{E}[\log(\hat{K}_2)]$ , note that:

$$\mathbb{E}[\log(\hat{K}_1)] + \mathbb{E}[\log(\hat{K}_2)] \quad (222)$$

$$\leq 2\log(e) + \mathbb{E}_{Y_{1:N} \sim Q(\cdot)} \left[ \frac{NP_x(Y_1)/Q(Y_1)}{\Delta_x \bar{Z}_x(Y_{1:N}, 1)} \left( \log \left( \frac{\hat{Z}_x(Y_{1:N})}{\Delta_x \bar{Z}_x(Y_{1:N}, 1)} \right) + \log \left( \frac{NP_x(Y_1)/Q(Y_1)}{\hat{Z}_x(Y_{1:N})} \right) \right) \right] \quad (223)$$

$$= 2\log(e) + \mathbb{E}_{Y_{1:N} \sim Q(\cdot)} \left[ \frac{NP_x(Y_1)/Q(Y_1)}{\Delta_x \bar{Z}_x(Y_{1:N}, 1)} \log \left( \frac{NP_x(Y_1)/Q(Y_1)}{\Delta_x \bar{Z}_x(Y_{1:N}, 1)} \right) \right] \quad (224)$$

$$= 2\log(e) + \mathbb{E}_{Y_{1:N} \sim Q(\cdot)} \left[ \frac{NP_x(Y_1)/Q(Y_1)}{\Delta_x \bar{Z}_x(Y_{1:N}, 1)} \left( \log \frac{P_x(Y_1)}{Q(Y_1)} + \log \left( \frac{N}{\Delta_x \bar{Z}_x(Y_{1:N}, 1)} \right) \right) \right] \quad (225)$$

$$= 2\log(e) + D_{KL}(P_x||Q) + \mathbb{E}_{Y_{1:N} \sim Q(\cdot)} \left[ \frac{N}{\Delta_x \bar{Z}_x(Y_{1:N}, 1)} \log \left( \frac{N}{\Delta_x \bar{Z}_x(Y_{1:N}, 1)} \right) \right] \quad (226)$$

$$= 2\log(e) + D_{KL}(P_x||Q) + E_1 \quad (227)$$

1065 where:

$$E_1 = \mathbb{E}_{Y_{1:N} \sim Q(\cdot)} \left[ \frac{N}{\Delta_x \bar{Z}_x(Y_{1:N}, 1)} \log \left( \frac{N}{\Delta_x \bar{Z}_x(Y_{1:N}, 1)} \right) \right] \quad (228)$$

1066 We will show in Appendix E.4.1 that:

$$E_1 \leq 3 \quad (229)$$

1067 and thus:

$$\mathbb{E}[\log(\hat{K}_1)] + \mathbb{E}[\log(\hat{K}_2)] \leq 2\log(e) + 3 + D_{KL}(P_x||Q) \quad (230)$$

1068 **E.4.1 Bound on  $E_1$**

1069 We consider two cases, when the batch size  $N \leq 7\omega_x$  and when  $N > 7\omega_x$ .

1070 Case 1:  $N \leq 7\omega_x$

1071 Recall that  $\bar{Z}_x(Y_{1:N}, 1) > \omega_x$  and  $\Delta_x \geq \frac{N}{N-1+\omega_x}$ , we have:

$$\frac{N}{\Delta_x \bar{Z}_x(Y_{1:N}, 1)} \leq \frac{N-1+\omega_x}{\omega_x} \quad (231)$$

$$< \frac{8\omega_x - 1}{\omega_x} \quad (\text{Since } N \leq 7\omega_x) \quad (232)$$

$$< 8 \quad (233)$$

1072 Thus, we have:

$$E_1 = \mathbb{E}_{Y_{1:N} \sim Q(\cdot)} \left[ \frac{N}{\Delta_x \bar{Z}_x(Y_{1:N}, 1)} \log \left( \frac{N}{\Delta_x \bar{Z}_x(Y_{1:N}, 1)} \right) \right] \quad (234)$$

$$\leq \mathbb{E}_{Y_{1:N} \sim Q(\cdot)} \left[ \frac{N}{\Delta_x \bar{Z}_x(Y_{1:N}, 1)} \log(8) \right] \quad (235)$$

$$= 3 \quad (\text{Since } \Delta_x = \mathbb{E}_{Y_{1:N} \sim Q(\cdot)} \left[ \frac{N}{\bar{Z}_x(Y_{1:N}, 1)} \right]), \quad (236)$$

1073 and hence  $E_1 \leq 3$  bit.

1074 Case 2:  $N > 7\omega_x$

1075 To upper-bound  $E_2$  in this regime, we first note that:

$$\Delta_x = \mathbb{E}_{Y_{1:N} \sim Q(\cdot)} \left[ \frac{N}{\bar{Z}_x(Y_{1:N}, 1)} \right] = \Pr(\text{Accept batch } B) \leq 1 \quad (237)$$

1076 Another way to see this is through the following arguments:

$$\mathbb{E}_{Y_{1:N} \sim Q(\cdot)} \left[ \frac{N}{\bar{Z}_x(Y_{1:N}, 1)} \right] \quad (238)$$

$$= \mathbb{E}_{Y_{1:N} \sim Q(\cdot)} \left[ \frac{NP_x(Y_1)/Q(Y_1)}{\bar{Z}_x(Y_{1:N}, 1)} \right] \quad (239)$$

$$= \mathbb{E}_{Y_{1:N} \sim Q(\cdot)} \left[ \frac{NP_x(Y_1)/Q(Y_1)}{\hat{Z}_x(Y_{1:N})} \frac{\hat{Z}_x(Y_{1:N})}{\bar{Z}_x(Y_{1:N}, 1)} \right] \quad (240)$$

$$\leq \mathbb{E}_{Y_{1:N} \sim Q(\cdot)} \left[ \frac{NP_x(Y_1)/Q(Y_1)}{\hat{Z}_x(Y_{1:N})} \right] \left( \text{Since } \frac{\hat{Z}_x(Y_{1:N})}{\bar{Z}_x(Y_{1:N}, 1)} \leq 1 \right) \quad (241)$$

$$= \sum_{i=1}^N \mathbb{E}_{Y_{1:N} \sim Q(\cdot)} \left[ \frac{P_x(Y_i)/Q(Y_i)}{\hat{Z}_x(Y_{1:N})} \right] \quad (\text{Due to symmetry}) \quad (242)$$

$$= 1, \quad (243)$$

1077 and as a consequence (which we will be using later), we have:

$$\mathbb{E}_{Y_{1:N} \sim Q(\cdot)} \left[ \frac{N+1}{\omega_x + \hat{Z}_x(Y_{1:N})} \right] \quad (244)$$

$$= \mathbb{E}_{Y_1^{N+1} \sim Q(\cdot)} \left[ \frac{N+1}{\omega_x + \hat{Z}_x(Y_{1:N})} \right] \quad (245)$$

$$\leq 1. \quad (246)$$

1078 Then, observe that:

$$E_1 = \mathbb{E}_{Y_{1:N} \sim Q(\cdot)} \left[ \frac{N}{\Delta_x \bar{Z}_x(Y_{1:N}, 1)} \log \left( \frac{N}{\Delta_x \bar{Z}_x(Y_{1:N}, 1)} \right) \right] \quad (247)$$

$$= \frac{1}{\Delta_x} \mathbb{E}_{Y_{1:N} \sim Q(\cdot)} \left[ \frac{N}{\bar{Z}_x(Y_{1:N}, 1)} \log \left( \frac{N}{\bar{Z}_x(Y_{1:N}, 1)} \right) \right] + \log \frac{1}{\Delta_x} \quad (248)$$

$$\leq 3 \text{ bits} \quad (249)$$

1079 where, to show the inequality at the end, we will prove the following two inequalities:

$$\log \frac{1}{\Delta_x} \leq \log \left( \frac{8}{7} \right) \quad (250)$$

$$\frac{1}{\Delta_x} \mathbb{E}_{Y_{1:N} \sim Q(\cdot)} \left[ \frac{N}{\bar{Z}_x(Y_{1:N}, 1)} \log \left( \frac{N}{\bar{Z}_x(Y_{1:N}, 1)} \right) \right] \leq \frac{16}{7}, \quad (251)$$

1080 and hence  $E_2 \leq 3$  (bits). For the first inequality, we have:

$$\Delta_x = \mathbb{E}_{Y_{1:N} \sim Q(\cdot)} \left[ \frac{N}{\bar{Z}_x(Y_{1:N}, 1)} \right] \quad (252)$$

$$\geq \frac{N}{\mathbb{E}_{Y_{1:N} \sim Q(\cdot)} [\bar{Z}_x(Y_{1:N}, 1)]} \quad (\text{Jensen's Inequality}) \quad (253)$$

$$= \frac{N}{N - 1 + \omega_x} \quad (254)$$

$$\geq \frac{N}{N - 1 + N/7} \quad (\text{Since } N > 7\omega_x) \quad (255)$$

$$\geq \frac{7}{8}, \quad (256)$$

1081 hence, we have:

$$\frac{1}{\Delta_x} \leq 8/7, \quad (257)$$

1082 which yields the first inequality after taking the  $\log(\cdot)$  in both sides.

1083 For the second inequality, we begin by establishing the following key inequality:

$$\frac{N}{\bar{Z}_x(Y_{1:N}, 1)} \leq \frac{2N}{\hat{Z}_x(Y_{1:N}) + \omega_x}, \quad (258)$$

1084 which is due to:

$$\frac{N}{\bar{Z}_x(Y_{1:N}, 1)} = \frac{N}{\omega_x + \sum_{i=2}^N \frac{P_x(Y_i)}{Q(Y_i)}} \quad (259)$$

$$\leq \frac{N}{\omega_x + \frac{1}{2} \sum_{i=2}^N \frac{P_x(Y_i)}{Q(Y_i)}} \quad (\text{Since } \frac{P_x(Y_i)}{Q(Y_i)} \geq 0 \text{ for all } i) \quad (260)$$

$$= \frac{2N}{2\omega_x + \sum_{i=2}^N \frac{P_x(Y_i)}{Q(Y_i)}} \quad (261)$$

$$\leq \frac{2N}{\omega_x + \sum_{i=1}^N \frac{P_x(Y_i)}{Q(Y_i)}} \quad (\text{Since } \frac{P_x(Y_i)}{Q(Y_i)} \leq \omega \text{ for all } i) \quad (262)$$

$$= \frac{2N}{\hat{Z}_x(Y_{1:N}) + \omega_x}, \quad (263)$$

1085 Then, we have:

$$\frac{1}{\Delta_x} \mathbb{E}_{Y_{1:N} \sim Q(\cdot)} \left[ \frac{N}{\bar{Z}_x(Y_{1:N}, 1)} \log \left( \frac{N}{\bar{Z}_x(Y_{1:N}, 1)} \right) \right] \quad (264)$$

$$\leq \frac{8}{7} \mathbb{E}_{Y_{1:N} \sim Q(\cdot)} \left[ \frac{N}{\bar{Z}_x(Y_{1:N}, 1)} \log \left( \frac{N}{\bar{Z}_x(Y_{1:N}, 1)} \right) \right] \quad (\text{Since } \Delta_x \geq \frac{7}{8} \text{ from (256)}) \quad (265)$$

$$= \frac{8}{7} \mathbb{E}_{Y_{1:N} \sim Q(\cdot)} \left[ \frac{NP_x(Y_1)/Q(Y_1)}{\bar{Z}_x(Y_{1:N}, 1)} \log \left( \frac{N}{\bar{Z}_x(Y_{1:N}, 1)} \right) \right] \quad (266)$$

$$\leq \frac{8}{7} \mathbb{E}_{Y_{1:N} \sim Q(\cdot)} \left[ \frac{NP_x(Y_1)/Q(Y_1)}{\bar{Z}_x(Y_{1:N}, 1)} \log \left( \frac{N}{\bar{Z}_x(Y_{1:N}, 1)} + 1 \right) \right] \quad (267)$$

$$\leq \frac{8}{7} \mathbb{E}_{Y_{1:N} \sim Q(\cdot)} \left[ \frac{NP_x(Y_1)/Q(Y_1)}{\bar{Z}_x(Y_{1:N}, 1)} \log \left( \frac{2N}{\hat{Z}_x(Y_{1:N}) + \omega_x} + 1 \right) \right] \quad (\text{Due to Inequality (258)}) \quad (268)$$

$$\leq \frac{8}{7} \mathbb{E}_{Y_{1:N} \sim Q(\cdot)} \left[ \frac{NP_x(Y_1)/Q(Y_1)}{\hat{Z}_x(Y_{1:N})} \log \left( \frac{2N}{\hat{Z}_x(Y_{1:N}) + \omega_x} + 1 \right) \right] \quad (\text{Since } \hat{Z}_x(Y_{1:N}) \leq \bar{Z}_x(Y_{1:N}, 1)) \quad (269)$$

$$= \frac{8}{7} \sum_{i=1}^N \mathbb{E}_{Y_{1:N} \sim Q(\cdot)} \left[ \frac{P_x(Y_i)/Q(Y_i)}{\hat{Z}_x(Y_{1:N})} \log \left( \frac{2N}{\hat{Z}_x(Y_{1:N}) + \omega_x} + 1 \right) \right] \quad (\text{Due to symmetry}) \quad (270)$$

$$= \frac{8}{7} \mathbb{E}_{Y_{1:N} \sim Q(\cdot)} \left[ \frac{\sum_{i=1}^N P_x(Y_i)/Q(Y_i)}{\hat{Z}_x(Y_{1:N})} \log \left( \frac{2N}{\hat{Z}_x(Y_{1:N}) + \omega_x} + 1 \right) \right] \quad (271)$$

$$= \frac{8}{7} \mathbb{E}_{Y_{1:N} \sim Q(\cdot)} \left[ \log \left( \frac{2N}{\hat{Z}_x(Y_{1:N}) + \omega_x} + 1 \right) \right] \quad (272)$$

$$\leq \frac{8}{7} \log \left( \mathbb{E}_{Y_{1:N} \sim Q(\cdot)} \left[ \frac{2N}{\hat{Z}_x(Y_{1:N}) + \omega_x} + 1 \right] \right) \quad (\text{Jensen's Inequality}) \quad (273)$$

$$= \frac{8}{7} \log \left( 1 + \frac{2N}{N+1} \mathbb{E}_{Y_{1:N} \sim Q(\cdot)} \left[ \frac{N+1}{\hat{Z}_x(Y_{1:N}) + \omega_x} \right] \right) \quad (274)$$

$$\leq \frac{8}{7} \log \left( 1 + \frac{2N}{N+1} \right) \quad (\text{Since } \mathbb{E}_{Y_{1:N} \sim Q(\cdot)} \left[ \frac{N+1}{\hat{Z}_x(Y_{1:N}) + \omega_x} \right] < 1 \text{ due to Inequality (246)}) \quad (275)$$

$$\leq \frac{8}{7} \log(4) \quad (276)$$

$$= \frac{16}{7} (\text{bits}) \quad (277)$$

1086 which completes the proof for this part.

#### 1087 **E.4.2 Proof of Inequality (164)**

1088 We first express the quantity  $\mathbb{E}[\log \hat{K}_1]$  with conditional expectation. The accepted batch and selected  
1089 local index  $K_2$  are distributed according to  $Y_{K_1,1:N}, K_2 \sim \bar{P}_{Y_{1:N}, K; x}$ , then:

$$\mathbb{E}[\log \hat{K}_1] \quad (278)$$

$$= \mathbb{E}[\mathbb{E}[\log \hat{K}_1 | Y_{K_1,1:N} = y_{1:N}, K_2 = k_2]] \quad (279)$$

$$= \sum_{k_2=1}^N \int_{-\infty}^{\infty} \left( \prod_{j=1, j \neq k_2}^N Q(y_j) \right) \frac{P_x(y_{k_2})}{\bar{Z}_x(y_{1:N}, k) \Delta_x} \mathbb{E}[\log \hat{K}_1 | Y_{K_1,1:N} = y_{1:N}, K_2 = k_2] dy_{1:N} \quad (280)$$

$$= N \int_{-\infty}^{\infty} \left( \prod_{j=2}^N Q(y_j) \right) \frac{P_x(y_1)}{\bar{Z}_x(y_{1:N}, 1) \Delta_x} \mathbb{E}[\log \hat{K}_1 | Y_{K_1,1:N} = y_{1:N}, K_2 = 1] dy_{1:N} \quad (281)$$

Notice that, since we accept a batch  $i$  when  $U_i \leq \frac{\hat{Z}_x(y_{1:N})}{\bar{Z}_x(y_{1:N}, 1)} \frac{\Delta_x}{\Delta}$ , we have that:

$$P(U_{K_1} = u | Y_{K_1, 1:N} = y_{1:N}, K_2 = 1) = \frac{\bar{Z}_x(y_{1:N}, 1)}{\hat{Z}_x(y_{1:N})} \frac{\Delta_x}{\Delta},$$

1090 then conditioning on  $U_{K_1}$  for the last expectation term above:

$$\mathbb{E}[\log \hat{K}_1 | Y_{K_1, 1:N} = y_{1:N}, K_2 = k] \quad (282)$$

$$= \int_{-\infty}^{\infty} \mathbb{E}[\log \hat{K}_1 | Y_{K_1, 1:N} = y_{1:N}, K_2 = 1, U_{K_1} = u] P(U_{K_1} = u | Y_{K_1, 1:N} = y_{1:N}, K_2 = 1) du \quad (283)$$

$$= \int_0^{\frac{\hat{Z}_x(y_{1:N})}{\bar{Z}_x(y_{1:N}, 1)} \frac{\Delta_x}{\Delta}} \mathbb{E}[\log \hat{K}_1 | Y_{K_1, 1:N} = y_{1:N}, K_2 = 1, U_{K_1} = u] \frac{\bar{Z}_x(y_{1:N}, 1)}{\hat{Z}_x(y_{1:N})} \frac{\Delta_x}{\Delta} du \quad (284)$$

$$\leq \frac{\Delta_x}{\Delta} \int_0^{\frac{\hat{Z}_x(y_{1:N})}{\bar{Z}_x(y_{1:N}, 1)} \frac{\Delta_x}{\Delta}} \frac{\bar{Z}_x(y_{1:N}, 1)}{\hat{Z}_x(y_{1:N})} \log \left[ 1 + \frac{u}{\Delta} \right] du \quad (\text{See the Sort Coding bound below.}) \quad (285)$$

$$\leq \frac{\Delta_x}{\Delta} \int_0^{\frac{\hat{Z}_x(y_{1:N})}{\bar{Z}_x(y_{1:N}, 1)} \frac{\Delta_x}{\Delta}} \frac{\bar{Z}_x(y_{1:N}, 1)}{\hat{Z}_x(y_{1:N})} \log \left[ 1 + \frac{\hat{Z}_x(y_{1:N})}{\Delta_x \bar{Z}_x(y_{1:N}, 1)} \right] du \quad (286)$$

$$= \log \left[ 1 + \frac{\hat{Z}_x(y_{1:N})}{\Delta_x \bar{Z}_x(y_{1:N}, 1)} \right], \quad (287)$$

1091 Finally, we have:

$$\mathbb{E}[\log \hat{K}_1] \quad (288)$$

$$= N \int_{-\infty}^{\infty} \left( \prod_{j=2}^N Q(y_j) \right) \frac{P_x(y_1)}{\bar{Z}_x(y_{1:N}, 1) \Delta_x} \log \left[ 1 + \frac{\hat{Z}_x(y_{1:N})}{\Delta_x \bar{Z}_x(y_{1:N}, 1)} \right] dy_{1:N} \quad (289)$$

$$\leq N \int_{-\infty}^{\infty} \left( \prod_{j=2}^N Q(y_j) \right) \frac{P_x(y_1)}{\bar{Z}_x(y_{1:N}, 1) \Delta_x} \left( \log \left[ \frac{\hat{Z}_x(y_{1:N})}{\Delta_x \bar{Z}_x(y_{1:N}, 1)} \right] + \log e \frac{\Delta_x \bar{Z}_x(y_{1:N}, 1)}{\hat{Z}_x(y_{1:N})} \right) dy_{1:N} \quad (290)$$

$$= N \int_{-\infty}^{\infty} \left( \prod_{j=2}^N Q(y_j) \right) \frac{P_x(y_1)}{\bar{Z}_x(y_{1:N}, 1) \Delta_x} \log \left[ \frac{\hat{Z}_x(y_{1:N})}{\Delta_x \bar{Z}_x(y_{1:N}, 1)} \right] dy_{1:N} + \log(e) \quad (291)$$

$$= \frac{N}{\Delta_x} \mathbb{E}_{Y_{1:N} \sim Q} \left[ \frac{P_x(Y_1)/Q(Y_1)}{\bar{Z}_x(Y_{1:N}, 1)} \log \left( \frac{\hat{Z}_x(Y_{1:N})}{\Delta_x \bar{Z}_x(Y_{1:N}, 1)} \right) \right] \quad (292)$$

1092 We show the proof for (285) below.

1093 **Sort Coding Bound.** To bound the expectation term, we first apply Jensen's inequality and condi-  
1094 tioning on the accepted chunk of batches  $L = \ell$ :

$$\mathbb{E}[\log \hat{K}_1 | Y_{K_1, 1:N} = y_{1:N}, K_2 = 1, U_{K_1} = u] \quad (293)$$

$$\leq \log(\mathbb{E}[\hat{K}_1 | Y_{K_1, 1:N} = y_{1:N}, K_2 = 1, U_{K_1} = u]) \quad (294)$$

$$= \log(\mathbb{E}[\hat{K}_1 | Y_{K_1, 1:N} = y_{1:N}, K_2 = 1, U_{K_1} = u]) \quad (295)$$

$$= \log(\mathbb{E}_L[\mathbb{E}[\hat{K}_1 | Y_{K_1, 1:N} = y_{1:N}, K_2 = 1, U_{K_1} = u, L = \ell]]) \quad (296)$$

1095 We now repeat the previous argument in standard RS. Specifically, given  $\hat{K}_1$  is within the range

1096  $L = \ell$  and  $U_{K_1} = u$ , we can express  $\hat{K}_1$  as follows:

$$\hat{K}_1 = |\{U_i < u, (\ell - 1)\lfloor \Delta^{-1} \rfloor + 1 \leq i \leq \ell\lfloor \Delta^{-1} \rfloor\}| + 1, \quad (297)$$

$$= \Omega(u, \ell) + 1 \quad (298)$$

1097 i.e. the number of  $U_i$  (plus 1 for the ranking) within the range  $L$  that has value lesser than  $u$ .

1098 We can see that the the index  $i$  within the range  $L$  satisfying  $U_i < u$  are from the indices that are  
 1099 either (1) rejected, i.e. index  $i < \hat{K}_1$  or (2) not examined by the algorithm, i.e. index  $i > \hat{K}_1$ . The  
 1100 rest of this proof will show the following bound:

$$\mathbb{E}[\Omega(u, \ell) | Y_{K_1, 1:N} = y_{1:N}, K_2 = 1, U_{K_1} = u, L = \ell] \leq \Delta^{-1}u, \text{ for any } \ell \quad (299)$$

1101 For readability, we split the proof into different proof steps.

1102 **Proof Step 1:** We condition on the mapped index of  $\pi(\hat{K})$  on the original array:

$$\mathbb{E}[\hat{K}_1 | Y_{K_1, 1:N} = y_{1:N}, K_2 = 1, U_{K_1} = u, L = \ell] \quad (300)$$

$$= \mathbb{E}_{\pi(\hat{K}_1)} \left[ \mathbb{E}[\hat{K}_1 | Y_{K_1, 1:N} = y_{1:N}, K_2 = 1, U_{K_1} = u, L = \ell, \pi(\hat{K}_1) = k_1] \right] \quad (301)$$

$$= \mathbb{E}_{\pi(\hat{K}_1)} \left[ \mathbb{E}[\Omega(u, \ell) + 1 | Y_{K_1, 1:N} = y_{1:N}, K_2 = 1, U_{K_1} = u, L = \ell, \pi(\hat{K}_1) = k_1] \right] \quad (302)$$

$$= \mathbb{E}_{\pi(\hat{K}_1)} \left[ \mathbb{E}[\Omega(u, \ell) | Y_{K_1, 1:N} = y_{1:N}, K_2 = 1, U_{K_1} = u, L = \ell, \pi(\hat{K}_1) = k_1] \right] + 1 \quad (303)$$

$$= \mathbb{E}_{\pi(\hat{K}_1)} \left[ \mathbb{E}[\Omega_1(u, \ell, k_1) + \Omega_2(u, \ell, k_1) | Y_{K_1, 1:N} = y_{1:N}, K_2 = 1, U_{K_1} = u, L = \ell, \pi(\hat{K}_1) = k_1] \right] + 1, \quad (304)$$

1103 where  $\Omega_1(u, \ell, k_1), \Omega_2(u, \ell, k_1)$  are the number of  $U_i < u$  within the range  $L = \ell$  that occurs before  
 1104 and after the selected index  $k_1$  respectively. Specifically:

$$\Omega_1(u, \ell, k_1) = |\{U_i < u, (\ell - 1)\lfloor \Delta^{-1} \rfloor + 1 \leq i < (\ell - 1)\lfloor \Delta^{-1} \rfloor + k_1\}| \quad (305)$$

$$\Omega_2(u, \ell, k_1) = |\{U_i < u, (\ell - 1)\lfloor \Delta^{-1} \rfloor + k_1 + 1 \leq i \leq \ell\lfloor \Delta^{-1} \rfloor\}|, \quad (306)$$

1105 which also naturally gives  $\Omega(u, \ell) = \Omega_1(u, \ell, k_1) + \Omega_2(u, \ell, k_1)$ .

**Proof Step 2:** Consider  $\Omega_2(u, \ell, k_1)$ , since each proposal  $(Y_{i, 1:N}, U_i)$  is i.i.d distributed and the fact that  $k_1$  is the index of the *first accepted batch*, for every  $i > k_1$ , we have:

$$\Pr(U_i < u | \bar{Y}_{1:N} = y_{1:N}, K_2 = 1, U_{K_1} = u, L = \ell, \pi(\hat{K}_1) = k_1) = \Pr(U_i < u)$$

1106 This gives us:

$$\mathbb{E}[\Omega_2(u, \ell, k_1) | Y_{K_1, 1:N} = y_{1:N}, K_2 = 1, U_{K_1} = u, L = \ell, \pi(\hat{K}_1) = k_1] \quad (307)$$

$$= (\lfloor \Delta^{-1} \rfloor - k_1) \Pr(U < u) \quad (308)$$

$$= (\lfloor \Delta^{-1} \rfloor - k_1)u \quad (309)$$

$$\leq \frac{(\lfloor \Delta^{-1} \rfloor - k_1)u}{\Pr(\text{Batch is rejected})} \quad (310)$$

$$\leq \frac{(\lfloor \Delta^{-1} \rfloor - k_1)u}{1 - \Delta} \quad (311)$$

1107 **Proof Step 3:** For  $\Omega_1(u, \ell, \hat{k}_1)$ , we do not have such independent property since for every batch  
 1108 with index  $i < k_1$ , we know that they are rejected batches, and hence for  $i < k_1$ :

$$\Pr(U_i < u | Y_{K_1, 1:N} = y_{1:N}, K_2 = k, U_{K_1} = u, L = \ell, \pi(\hat{K}_1) = k_1) \quad (312)$$

$$= \Pr(U_i < u | Y_{i, 1:N} \text{ is rejected}) \quad (313)$$

$$= \frac{\Pr(U_i < u, Y_{i, 1:N} \text{ is rejected})}{\Pr(Y_{i, 1:N} \text{ is rejected})} \quad (314)$$

$$\leq \frac{\Pr(U_i < u)}{\Pr(Y_{i, 1:N} \text{ is rejected})} \quad (315)$$

$$= \frac{u}{1 - \Delta}, \quad (316)$$

1109 which gives us:

$$\mathbb{E}[\Omega_2(u, \ell, k_1) | Y_{K_1, 1:N} = y_{1:N}, K_2 = 1, U_{K_1} = u, L = \ell, \pi(\hat{K}_1) = k_1] \leq \frac{(k_1 - 1)u}{1 - \Delta} \quad (317)$$

1110 To prove Equation (313), note that the following events are equivalent:

$$\{Y_{K_1,1:N} = y_{1:N}, K_2 = 1, U_{K_1} = u, L = \ell, \pi(\hat{K}_1) = k_1\} \quad (318)$$

$$= \{Y_{k_1,1:N} = y_{1:N}, K_2 = 1, U_k = u, B_{1,\dots,k-1} \text{ are rejected}\} \quad (319)$$

$$\triangleq \Lambda(u, y, k_1) \quad (320)$$

1111 Here, we note that  $Y_{k_1}, U_{k_1}$  denote the value at batch index  $k$  within  $W$ , which is different from

1112  $Y_{K_1}, U_{K_1}$ , the value selected by the rejection sampler. Hence:

$$\Pr(U_i < u | \Lambda(u, y, k_1)) \quad (321)$$

$$= \frac{\Pr(U_i < u, B_{1\dots k_1-1} \text{ are rejected} | Y_{k,1:N} = y_{1:N}, U_k = u, K_2 = 1)}{\Pr(B_{1\dots k_1-1} \text{ are rejected} | Y_{k,1:N} = y_{1:N}, U_k = u, K_2 = 1)} \quad (322)$$

$$= \frac{\Pr(U_i < u, B_{1\dots k_1-1} \text{ are rejected})}{\Pr(B_{1\dots k_1-1} \text{ are rejected})} \quad (\text{Since } (Y_i, U_i) \text{ are i.i.d}) \quad (323)$$

$$= \Pr(U_i < u | B_i \text{ is rejected}), \quad (324)$$

1113 **Proof Step 4:** From the above result from Step 2 and 3, we have  $\Omega(u, \ell) = \Omega_1(u, \ell, k) +$

1114  $\Omega_2(u, \ell, k) \leq \frac{(\lfloor \Delta^{-1} \rfloor - 1)u}{1 - \Delta}$  and as a result:

$$\mathbb{E}[\log \hat{K}_1 | Y_{K_1,1:N} = y_{1:N}, K_2 = 1, U_{K_1} = u] \leq \frac{(\lfloor \Delta^{-1} \rfloor - 1)u}{1 - \Delta} + 1 \quad (325)$$

$$\leq \frac{(\Delta^{-1} - 1)u}{1 - \Delta} + 1 \quad (\text{Since } \lfloor \Delta^{-1} \rfloor \leq \Delta^{-1}) \quad (326)$$

$$= \Delta^{-1}u + 1 \quad (327)$$

1115 which completes the proof.

## 1116 F ERS Matching Lemmas

### 1117 F.1 Preliminaries

1118 We begin by providing the following bounds on inverse moments of averages.

1119 **Proposition F.1.** *Let  $Y_1, Y_2, \dots, Y_N \sim Q_Y(\cdot)$  and suppose the target distribution  $P_Y$  satisfies:*

$$d_2(Q_Y \| P_Y) \triangleq \mathbb{E}_{Y \sim Q_Y(\cdot)} \left[ \frac{Q_Y(Y)}{P_Y(Y)} \right] < \infty, \quad (328)$$

1120 *then we have:*

$$\mathbb{E}_{Y_{1:N} \sim Q_Y(\cdot)} \left[ \frac{N}{\sum_{i=1}^N \frac{P_Y(Y_i)}{Q_Y(Y_i)}} \right] \leq d_2(Q_Y \| P_Y). \quad (329)$$

1121 *Proof.* Applying the Cauchy-Schwarz inequality, we have:

$$\frac{N}{\sum_{i=1}^N \frac{P_Y(Y_i)}{Q_Y(Y_i)}} \leq \frac{1}{N} \sum_{j=1}^N \frac{Q_Y(Y_j)}{P_Y(Y_j)} \quad (330)$$

1122 Taking the expectation of both sides yield the desired inequality.  $\square$

1123 **Remark F.2.** *In general, stronger results on the inverse moments of averages exist under weaker*  
1124 *moment assumptions, specifically:*

$$\mathbb{E}_{Y \sim Q_Y} \left[ \left( \frac{Q_Y(Y)}{P_Y(Y)} \right)^\eta \right]$$

1125 *is finite for some  $\eta < 0$ . The resulting bound has a similar form (some power terms involved) to that*  
1126 *of Proposition F.1 but requires a mild threshold on  $N$ . For further details, see Proposition A.1 in [9].*

1127 We show an application of Proposition F.1, which we will use repeatedly:

1128 **Corollary F.3.** *Let  $Y_1, Y_2, \dots, Y_N \sim Q_Y(\cdot)$  and suppose the target distributions  $P_Y^A, P_Y^B$  satisfy:*

$$d_2(Q_Y \| P_Y^A) \triangleq \mathbb{E}_{Y \sim Q_Y(\cdot)} \left[ \frac{Q_Y(Y)}{P_Y^A(Y)} \right] < \infty, \quad \text{and} \quad \frac{P_Y^A(y)}{Q_Y(y)}, \frac{P_Y^B(y)}{Q_Y(y)} \leq \omega \text{ for all } y. \quad (331)$$

1129 *Then, for any  $N \geq 1$ ,*

$$\mathbb{E}_{Y_{1:N} \sim Q_Y(\cdot)} \left[ \frac{\sum_{j=1}^N \frac{P_Y^B(Y_j)}{Q_Y(Y_j)}}{\sum_{i=1}^N \frac{P_Y^A(Y_i)}{Q_Y(Y_i)}} \right] \leq \mathbb{I}_N(\omega, 1) \cdot d_2(Q_Y \| P_Y), \quad (332)$$

1130 *where we define  $\mathbb{I}_N(\omega, i) \triangleq (2\mathbb{I}_{N>i} + \omega\mathbb{I}_{N=i})$ .*

1131 *Proof.* For  $N = 1$ , applying the conditions for  $P_Y^A$  and  $P_Y^B$  gives us an upper-bound of  $\omega d_2(Q_Y \| P_Y^A)$ .

1132 For  $N > 1$ , we have:

$$\mathbb{E}_{Y_{1:N} \sim Q_Y(\cdot)} \left[ \frac{\sum_{j=1}^N \frac{P_Y^B(Y_j)}{Q_Y(Y_j)}}{\sum_{i=1}^N \frac{P_Y^A(Y_i)}{Q_Y(Y_i)}} \right] = N \mathbb{E}_{Y_{1:N} \sim Q_Y(\cdot)} \left[ \frac{\frac{P_Y^B(Y_1)}{Q_Y(Y_1)}}{\sum_{i=1}^N \frac{P_Y^A(Y_i)}{Q_Y(Y_i)}} \right] \quad (\text{Due to symmetry}) \quad (333)$$

$$\leq N \mathbb{E}_{Y_{1:N} \sim Q_Y(\cdot)} \left[ \frac{\frac{P_Y^B(Y_1)}{Q_Y(Y_1)}}{\sum_{i=2}^N \frac{P_Y^A(Y_i)}{Q_Y(Y_i)}} \right] \quad (\text{since } \frac{P_Y^A(Y_1)}{Q_Y(Y_1)} \geq 0) \quad (334)$$

$$= \frac{N}{N-1} \mathbb{E}_{Y_{1:N} \sim Q_Y(\cdot)} \left[ \frac{N-1}{\sum_{i=2}^N \frac{P_Y^A(Y_i)}{Q_Y(Y_i)}} \right] \quad (335)$$

$$\leq 2d_2(Q_Y \| P_Y^A) \quad (\text{Proposition F.1 and } N > 1), \quad (336)$$

1133 which completes the proof.  $\square$

## 1134 F.2 Distributed Matching Without Batch Communication

1135 Before the proof, we outline the details of each case in Section 3.2, covering scenarios without and  
1136 with communication between the encoder and decoder.

1137 **Without-Communication.** In this scenario, let  $P_Y^A(\cdot)$  and  $P_Y^B(\cdot)$  be the target distributions at the  
1138 encoder and decoder respectively, where we use the same shared randomness  $W$  as in Section 5.1  
1139 where we use the proposal distribution  $Q_Y(\cdot)$ . Furthermore, we assume that:

$$\max_y \left( \frac{P_Y^A(y)}{Q_Y(y)} \right) = \omega_A, \quad \max_y \left( \frac{P_Y^B(y)}{Q_Y(y)} \right) = \omega_B, \quad \max_y \left( \frac{P_Y^A(y)}{Q_Y(y)}, \frac{P_Y^B(y)}{Q_Y(y)} \right) \leq \omega, \quad (337)$$

1140 Using the ERS procedure, the encoder and decoder select the indices  $K_A$  and  $K_B$  respectively.

$$K_A = \text{ERS}(W; P_Y^A, Q_Y), \quad K_B = \text{ERS}(W; P_Y^B, Q_Y), \quad (338)$$

1141 The  $\text{ERS}(\cdot)$  function follows Algorithm 1, without requiring any specific scaling factor. During the  
1142 selection process, the calculation of  $\bar{Z}$  in Step 3 of this algorithm, which determines the acceptance  
1143 probability, uses the ratio upper bounds  $\omega_A$  and  $\omega_B$  for parties  $A$  and  $B$ , respectively. Proposition F.4  
1144 establishes the bound on the probability that both parties produce the same output, conditioned on  
1145  $Y_{K_A} = y$ .

1146 **Proposition F.4.** Let  $K_A, K_B$  and  $P_Y^A, P_Y^B$  defined as above and  $N \geq 2$ , we have:

$$\Pr(Y_{K_A} = Y_{K_B} | Y_{K_A} = y) \geq \left( 1 + \mu_1(N) + \frac{P_Y^A(y)}{P_Y^B(y)} (1 + \mu_2(N)) \right)^{-1}, \quad (339)$$

1147 where  $\mu_1(N)$  and  $\mu_2(N)$  are defined as in Appendix F.3 and we note that  $\mu_1(N), \mu_2(N) \rightarrow 0$  as  
1148  $N \rightarrow \infty$  under mild assumptions on the distributions  $P_Y^A, P_Y^B$  and  $Q_Y$ .

1149 *Proof.* See Appendix F.4. □

1150 **With Communication.** Following the setup described in Section 5.3, we define the ratio upperbounds  
1151 in the communication case as below:

$$\max_z \left( \frac{P_{Y|Z}(y|x)}{Q_Y(y)} \right) = \omega_x, \quad \max_z \left( \frac{\tilde{P}_{Y|Z}(y|z)}{Q_Y(y)} \right) = \omega_z, \quad \max_{y,z} \left( \frac{P_{Y|X}(y|x)}{Q_Y(y)}, \frac{\tilde{P}_{Y|Z}(y|z)}{Q_Y(y)} \right) \leq \omega,$$

1152 and similar to the case without communication, the  $\text{ERS}(\cdot)$  selection process at the encoder and  
1153 decoder also follows Algorithm 1, with the calculation of  $\bar{Z}$  in Step 3 uses the upperbound  $\omega_x$  and  $\omega_z$   
1154 respectively for the encoder and decoder. The bound for this case is shown below.

1155 **Proposition F.5.** For  $N \geq 2$  and  $X, Y, Z$  defined as above, we have:

$$\Pr(Y_{K_A} = Y_{K_B} | Y_{K_A} = y, X = x, Z = z) \geq \left( 1 + \mu_1^{\text{cond}}(N) + \frac{P_{Y|X}(y|x)}{\tilde{P}_{Y|Z}(y|z)} (1 + \mu_2^{\text{cond}}(N)) \right)^{-1}, \quad (340)$$

1156 where  $\mu_1^{\text{cond}}(N)$  and  $\mu_2^{\text{cond}}(N)$  are defined as in Appendix F.5 and we note that  
1157  $\mu_1^{\text{cond}}(N), \mu_2^{\text{cond}}(N) \rightarrow 0$  as  $N \rightarrow \infty$  under mild assumptions on the distributions  
1158  $P_{Y|X}(\cdot|x), \tilde{P}_{Y|Z}(\cdot|z)$  and  $Q_Y(\cdot)$ .

1159 *Proof.* See Appendix F.6. □

## 1160 F.3 Coefficients in Proposition F.4

1161 We first define the coefficient  $\mu_1(N)$  and  $\mu_2(N)$  in Proposition F.4.

$$\mu_1(N) = \frac{1}{N} \left[ \omega + \omega \mathbb{I}_N(\omega, 2) d_2(Q_Y \| P_Y^B) + \frac{\omega^2}{N-1} d_2(Q_Y \| P_Y^B) \right] \quad (341)$$

$$\mu_2(N) = \frac{1}{N} \left[ \omega + \omega \mathbb{I}_N(\omega, 2) d_2(Q_Y \| P_Y^A) + \frac{\omega^2}{N-1} d_2(Q_Y \| P_Y^A) \right] \quad (342)$$

1162 where we define  $\mathbb{I}_N(\omega, i) \triangleq (2\mathbb{1}_{N>i} + \omega \mathbb{1}_{N=i})$  as in Proposition F.3.

#### 1163 **F.4 Proof of Proposition F.4**

1164 We prove the matching probability for the case of ERS. We note that in this proof, we will use the  
 1165 global index for the proposals  $Y_1, \dots, Y_N \sim Q(\cdot)$  instead of  $Y_{1,1}, \dots, Y_{1,N}$  unless otherwise stated. First,  
 1166 consider:

$$\Pr(Y_{K_A} = Y_{K_B} | Y_{K_A} = y_1) \quad (343)$$

$$\geq \Pr(K_A = K_B | Y_{K_A} = y_1) \quad (344)$$

$$= \sum_{k=1}^{\infty} \Pr(K_A = K_B = k | Y_{K_A} = y_1) \quad (345)$$

$$\geq \sum_{k=1}^N \Pr(K_A = K_B = k | Y_{K_A} = y_1) \quad (346)$$

$$= N \Pr(K_A = K_B = 1 | Y_{K_A} = y_1) \quad (347)$$

$$= \frac{NQ_Y(y_1)}{P_Y^A(y_1)} \Pr(K_{2,A} = K_{2,B} = 1, K_{1,A} = K_{1,B} = 1 | Y_1 = y_1) \quad (348)$$

$$= \frac{NQ_Y(y_1)}{P_Y^A(y_1)} \int \Pr(K_{2,A} = K_{2,B} = 1, K_{1,A} = K_{1,B} = 1, Y_{2:N} = y_{2:N} | Y_1 = y_1) dy_{2:N} \quad (349)$$

$$= \frac{NQ_Y(y_1)}{P_Y^A(y_1)} \int \Pr(K_{2,A} = K_{2,B} = 1, K_{1,A} = K_{1,B} = 1 | Y_{1:N} = y_{1:N}) Q_Y(y_{2:N}) dy_{2:N} \quad (350)$$

$$= \frac{NQ_Y(y_1)}{P_Y^A(y_1)} \int \Pr(K_{2,A} = K_{2,B} = 1 | Y_{1:N} = y_{1:N}) \times \Pr(K_{1,A} = K_{1,B} = 1 | K_{2,A} = K_{2,B} = 1, Y_{1:N} = y_{1:N}) Q_Y(y_{2:N}) dy_{2:N} \quad (351)$$

$$= \frac{NQ_Y(y_1)}{P_Y^A(y_1)} \mathbb{E}_{Y_{2:N} \sim Q_Y(\cdot)} [\Pr(K_{2,A} = K_{2,B} = 1 | Y_{1:N} = y_{1:N}) \times \Pr(K_{1,A} = K_{1,B} = 1 | K_{2,A} = K_{2,B} = 1, Y_{1:N} = y_{1:N})] \quad (352)$$

1167 where (348) is due to the following fact that:

$$\{K_A = K_B = 1, Y_{K_A} = y_1\} = \{K_A = K_B = 1, Y_1 = y_1\}, \quad (353)$$

1168 and thus:

$$\Pr(K_A = K_B = 1 | Y_{K_A} = y_1) = \frac{\Pr(K_A = K_B = 1 | Y_1 = y_1) Q_Y(y_1)}{P(Y_{K_A} = y_1)} \quad (354)$$

$$= \frac{\Pr(K_A = K_B = 1 | Y_1 = y_1) Q_Y(y_1)}{P_Y^A(y_1)} \quad (355)$$

$$(356)$$

1169 Define:

$$\hat{Z}(P_Y^A, y_{1:N}) = \sum_{i=1}^N \frac{P_Y^A(y_i)}{Q_Y(y_i)}, \quad \hat{Z}(P_Y^B, y_{1:N}) = \sum_{i=1}^N \frac{P_Y^B(y_i)}{Q_Y(y_i)} \quad (357)$$

1170 Now, we note that:

$$\Pr(K_{2,A} = K_{2,B} = 1 | Y_{1:N} = y_{1:N}) \quad (358)$$

$$= \Pr(K_{2,A} = 1 | Y_{1:N} = y_{1:N}) \Pr(K_{2,B} = 1 | Y_{1:N} = y_{1:N}, K_{2,A} = 1) \quad (359)$$

$$= \frac{P_Y^A(y_1)/Q_Y(y_1)}{\sum_{i=1}^N P_Y^A(y_i)/Q_Y(y_i)} \Pr(K_{2,B} = 1 | Y_{1:N} = y_{1:N}, K_{2,A} = 1) \quad (360)$$

$$\geq \frac{P_Y^A(y_1)/Q_Y(y_1)}{\hat{Z}(P_Y^A, y_{1:N})} \left( 1 + \frac{P_Y^A(y_1)}{P_Y^B(y_1)} \cdot \frac{\hat{Z}(P_Y^B, y_{1:N})}{\hat{Z}(P_Y^A, y_{1:N})} \right)^{-1}, \quad (361)$$

1171 where we denote  $\hat{Z}(P_Y^A, y_{1:N}) = \sum_{i=1}^N P_Y^A(y_i)/Q_Y(y_i)$  and the last inequality is due to Proposition  
1172 1 in [32]. Also:

$$\Pr(K_{1,A}(1)=K_{1,B}(1)=1|K_{2,A}=K_{2,B}=1, Y_{1:N}=y_{1:N}) \quad (362)$$

$$\geq \min \left( \frac{\hat{Z}(P_Y^A, y_{1:N})}{\hat{Z}(P_Y^A, y_{2:N}) + \omega}, \frac{\hat{Z}(P_Y^B, y_{1:N})}{\hat{Z}(P_Y^B, y_{2:N}) + \omega} \right) \left( \text{Since } \omega \geq \max_y \left( \frac{P_Y^A(y)}{Q_Y(y)}, \frac{P_Y^B(y)}{Q_Y(y)} \right) \right) \quad (363)$$

$$\geq \left( \frac{\hat{Z}(P_Y^A, y_{1:N})}{\hat{Z}(P_Y^A, y_{2:N}) + \omega} \right) \left( \frac{\hat{Z}(P_Y^B, y_{1:N})}{\hat{Z}(P_Y^B, y_{2:N}) + \omega} \right), \quad (364)$$

1173 where we use the inequality  $\min(a, b) \geq ab$  for  $0 \leq a, b \leq 1$ . Plug both in (352), we have:

$$\Pr(K_A=K_B|Y_{K_A}=y_1) \quad (365)$$

$$\begin{aligned} &\geq \mathbb{E}_{Y_{2:N} \sim Q_Y(\cdot)} \left[ \frac{1}{\left(1 + \frac{P_Y^A(y_1)}{P_Y^B(y_1)} \cdot \frac{\hat{Z}(P_Y^B, y_{1:N})}{\hat{Z}(P_Y^A, y_{1:N})}\right)} \left( \frac{N}{\hat{Z}(P_Y^A, y_{2:N}) + \omega} \right) \left( \frac{\hat{Z}(P_Y^B, y_{1:N})}{\sum_{i=2}^N \hat{Z}(P_Y^B, y_{2:N}) + \omega} \right) \right] \\ &= \mathbb{E}_{Y_{2:N} \sim Q_Y(\cdot)} \left[ \frac{1}{\left(1 + \frac{P_Y^A(y_1)}{P_Y^B(y_1)} \cdot \frac{\hat{Z}(P_Y^B, y_{1:N})}{\hat{Z}(P_Y^A, y_{1:N})}\right) \left( \frac{\hat{Z}(P_Y^A, y_{2:N}) + \omega}{N} \right) \left( \frac{\hat{Z}(P_Y^B, y_{2:N}) + \omega}{\hat{Z}(P_Y^B, y_{1:N})} \right)} \right] \quad (366) \end{aligned}$$

$$\geq \left( \mathbb{E}_{Y_{2:N} \sim Q_Y(\cdot)} \left[ \left( 1 + \frac{P_Y^A(y_1)}{P_Y^B(y_1)} \cdot \frac{\hat{Z}(P_Y^B, y_{1:N})}{\hat{Z}(P_Y^A, y_{1:N})} \right) \left( \frac{\hat{Z}(P_Y^A, y_{2:N}) + \omega}{N} \right) \left( \frac{\hat{Z}(P_Y^B, y_{2:N}) + \omega}{\hat{Z}(P_Y^B, y_{1:N})} \right) \right] \right)^{-1} \quad (367)$$

$$= \left( \mathbb{E}_{Y_{2:N} \sim Q_Y(\cdot)} \left[ \zeta_1 + \frac{P_Y^A(y_1)}{P_Y^B(y_1)} \zeta_2 \right] \right)^{-1}, \quad (368)$$

1174 where we use Jensen's inequality for the convex function  $1/x$  in line (367) and set:

$$\zeta_1 = \left( \frac{\hat{Z}(P_Y^A, y_{2:N}) + \omega}{N} \right) \left( \frac{\hat{Z}(P_Y^B, y_{2:N}) + \omega}{\hat{Z}(P_Y^B, y_{1:N})} \right) \quad (369)$$

$$\begin{aligned} &= \frac{\hat{Z}(P_Y^A, y_{2:N}) \cdot \hat{Z}(P_Y^B, y_{2:N})}{N \hat{Z}(P_Y^B, y_{1:N})} + \frac{\omega}{N} \cdot \frac{\hat{Z}(P_Y^A, y_{2:N})}{\hat{Z}(P_Y^B, y_{1:N})} + \frac{\omega}{N} \cdot \frac{\hat{Z}(P_Y^B, y_{2:N})}{\hat{Z}(P_Y^B, y_{1:N})} + \frac{\omega^2}{N \cdot \hat{Z}(P_Y^B, y_{1:N})} \\ &\leq \frac{1}{N} \hat{Z}(P_Y^A, y_{2:N}) + \frac{\omega}{N} \cdot \frac{\hat{Z}(P_Y^A, y_{2:N})}{\hat{Z}(P_Y^B, y_{2:N})} + \frac{\omega}{N} + \frac{\omega^2}{N \hat{Z}(P_Y^B, y_{2:N})}, \quad (370) \end{aligned}$$

1175 with the last inequality due to  $\sum_{i=1}^N z_i \geq \sum_{i=2}^N z_i$  for any positive  $z$ . We then have:

$$\mathbb{E}_{y_{2:N} \sim Q_Y(\cdot)} [\zeta_1] \quad (371)$$

$$\leq \mathbb{E}_{y_{2:N} \sim Q_Y(\cdot)} \left[ \frac{\hat{Z}(P_Y^A, y_{2:N})}{N} + \frac{\omega}{N} \cdot \frac{\hat{Z}(P_Y^A, y_{2:N})}{\hat{Z}(P_Y^B, y_{2:N})} + \frac{\omega}{N} + \frac{\omega^2}{N \hat{Z}(P_Y^B, y_{2:N})} \right] \quad (372)$$

$$= \frac{N-1}{N} + \frac{\omega}{N} + \frac{\omega}{N} \mathbb{E}_{y_{2:N} \sim Q_Y(\cdot)} \left[ \frac{\hat{Z}(P_Y^A, y_{2:N})}{\hat{Z}(P_Y^B, y_{2:N})} \right] + \frac{\omega^2}{N} \mathbb{E}_{y_{2:N} \sim Q_Y(\cdot)} \left[ \frac{1}{\hat{Z}(P_Y^B, y_{2:N})} \right] \quad (373)$$

$$\leq 1 + \frac{1}{N} \left( \omega + \omega \mathbb{E}_{y_{2:N} \sim Q_Y(\cdot)} \left[ \frac{\hat{Z}(P_Y^A, y_{2:N})}{\hat{Z}(P_Y^B, y_{2:N})} \right] + \omega^2 \mathbb{E}_{y_{2:N} \sim Q_Y(\cdot)} \left[ \frac{1}{\hat{Z}(P_Y^B, y_{2:N})} \right] \right) \quad (374)$$

$$\leq 1 + \frac{1}{N} \left[ \omega + \omega \mathbb{I}_N(\omega, 2) d_2(Q_Y \| P_Y^B) + \frac{\omega^2}{N-1} d_2(Q_Y \| P_Y^B) \right] \quad (375)$$

$$= 1 + \mu_1(N), \quad (376)$$

1176 where the last inequality is due to Proposition F.1 and Corollary F.3.. For the other term, we have:

$$\zeta_2 = \left( \frac{\hat{Z}(P_Y^B, y_{1:N})}{\hat{Z}(P_Y^A, y_{1:N})} \right) \left( \frac{\hat{Z}(P_Y^A, y_{2:N}) + \omega}{N} \right) \left( \frac{\hat{Z}(P_Y^B, y_{2:N}) + \omega}{\hat{Z}(P_Y^B, y_{1:N})} \right) \quad (377)$$

$$= \frac{1}{N} \left( \frac{\hat{Z}(P_Y^A, y_{2:N})}{\hat{Z}(P_Y^A, y_{1:N})} + \frac{\omega}{\hat{Z}(P_Y^A, y_{1:N})} \right) (\hat{Z}(P_Y^B, y_{2:N}) + \omega) \quad (378)$$

$$\leq \frac{1}{N} \left( 1 + \frac{\omega}{\hat{Z}(P_Y^A, y_{2:N})} \right) (\hat{Z}(P_Y^B, y_{2:N}) + \omega) \quad (379)$$

$$= \frac{\hat{Z}(P_Y^B, y_{2:N})}{N} + \frac{1}{N} \left( \omega + \frac{\omega \hat{Z}(P_Y^B, y_{2:N})}{\hat{Z}(P_Y^A, y_{2:N})} + \frac{\omega^2}{\hat{Z}(P_Y^A, y_{2:N})} \right). \quad (380)$$

1177 where we again repeatedly use the inequality  $\sum_{i=1}^N z_i \geq \sum_{i=2}^N z_i$  for any positive  $z$ . This gives us:

$$\mathbb{E}_{y_{2:N} \sim Q_Y(\cdot)}[\zeta_2] \quad (381)$$

$$\leq \frac{1}{N} \left( \omega + \omega \mathbb{E}_{y_{2:N} \sim Q_Y(\cdot)} \left[ \frac{\hat{Z}(P_Y^B, y_{2:N})}{\hat{Z}(P_Y^A, y_{2:N})} \right] + \omega^2 \mathbb{E}_{y_{2:N} \sim Q_Y(\cdot)} \left[ \frac{1}{\hat{Z}(P_Y^A, y_{2:N})} \right] \right) \quad (382)$$

$$\leq \frac{1}{N} \left[ \omega + \omega \mathbb{I}_N(\omega, 2) d_2(Q_Y \| P_Y^A) + \frac{\omega^2}{N-1} d_2(Q_Y \| P_Y^A) \right] \quad (383)$$

$$= \mu_2(N), \quad (384)$$

1178 where the last inequality is due to Proposition F.1 and Corollary F.3. This completes the proof.

## 1179 **F.5 Coefficients in Proposition F.5**

1180 We define the coefficient  $\mu_1^{\text{cond}}(N)$  and  $\mu_2^{\text{cond}}(N)$  in Proposition F.5.

$$\mu_1^{\text{cond}}(N) = \frac{1}{N} \left[ \omega + \omega \mathbb{I}_N(\omega, 2) d_2(Q_Y \| \tilde{P}_{Y|Z}(\cdot|z)) + \frac{\omega^2}{N-1} d_2(Q_Y \| \tilde{P}_{Y|Z}(\cdot|z)) \right] \quad (385)$$

$$\mu_2^{\text{cond}}(N) = \frac{1}{N} \left[ \omega + \omega \mathbb{I}_N(\omega, 2) d_2(Q_Y \| P_{Y|X}(\cdot|x)) + \frac{\omega^2}{N-1} d_2(Q_Y \| P_{Y|X}(\cdot|x)) \right] \quad (386)$$

1181 where we define  $\mathbb{I}_N(\omega, i) \triangleq (2\mathbb{I}_{N>i} + \omega \mathbb{I}_{N=i})$  as in Proposition F.3.

## 1182 **F.6 Proof of Proposition F.5**

1183 We will use the global index for the proposals  $Y_1, \dots, Y_N \sim Q(\cdot)$  instead of  $Y_{1,1}, \dots, Y_{1,N}$  unless  
1184 otherwise stated. For the communication version, we have:

$$\Pr(Y_{K_A} = Y_{K_B} | Y_{K_A} = y_1, X = x, Z = z) \quad (387)$$

$$\geq \Pr(K_A = K_B | Y_{K_A} = y_1, X = x, Z = z) \quad (388)$$

$$= \sum_{k=1}^{\infty} \Pr(K_A = K_B = k | Y_{K_A} = y_1, X = x, Z = z) \quad (389)$$

$$\geq \sum_{k=1}^N \Pr(K_A = K_B = k | Y_{K_A} = y_1, X = x, Z = z) \quad (390)$$

$$= N \Pr(K_A = K_B = 1 | Y_{K_A} = y_1, X = x, Z = z) \quad (391)$$

$$= N \Pr(K_{1,A} = K_{1,B} = 1, K_{2,A} = K_{2,B} = 1 | Y_{K_A} = y_1, X = x, Z = z) \quad (392)$$

1185 Define:

$$\hat{Z}(P_{Y|X=x}, y_{1:N}) = \sum_{i=1}^N \frac{P_{Y|X}(y_i|x)}{Q_Y(y_i)}, \quad \hat{Z}(\tilde{P}_{Y|Z=z}, y_{1:N}) = \sum_{i=1}^N \frac{\tilde{P}_{Y|Z}(y_i|z)}{Q_Y(y_i)} \quad (393)$$

1186 Now consider the following terms:

$$E_1 = \Pr(K_{1,A} = 1, K_{2,A} = 1 | Y_{K_A} = y_1, Y_{2:N} = y_{2:N}, X = x, Z = z) \\ \times P(Y_{2:N} = y_{2:N} | Y_{K_A} = y_1, X = x, Z = z) \quad (394)$$

$$= \frac{1}{P_{X,Y,Z}(x, y_1, z)} Q_Y(y_{1:N}) P_X(x) \Pr(K_{2,A} = 1 | Y_{1:N} = y_{1:N}, X = x) \\ \times \Pr(K_{1,A} = 1 | Y_{1:N} = y_{1:N}, X = x, K_{2,A} = 1) P_Z(z | Y_{1:N} = y_{1:N}, X = x, K_A = 1) \quad (395)$$

$$= \frac{1}{P_{X,Y,Z}(x, y_1, z)} Q_Y(y_{1:N}) P_X(x) \Pr(K_{2,A} = 1 | Y_{1:N} = y_{1:N}, X = x) \\ \times \Pr(K_{1,A} = 1 | Y_{1:N} = y_{1:N}, X = x, K_{2,A} = 1) P_{Z|X,Y}(z | X = x, Y = y_1) \quad (396)$$

$$= \frac{Q_Y(y_{1:N})}{P_{Y|X}(y_1 | x)} \Pr(K_{2,A} = 1 | Y_{1:N} = y_{1:N}, X = x) \\ \times \Pr(K_{1,A} = 1 | Y_{1:N} = y_{1:N}, X = x, K_{2,A} = 1) \quad (397)$$

$$= \frac{Q_Y(y_{1:N})}{P_{Y|X}(y_1 | x)} \frac{P_{Y|X}(y_1 | x) / Q_Y(y_1)}{\hat{Z}(P_{Y|X=x}, y_{2:N}) + \omega_x} \quad (398)$$

$$= \frac{Q_Y(y_{2:N})}{\hat{Z}(P_{Y|X=x}, y_{2:N}) + \omega_x} \quad (399)$$

1187 and:

$$E_2 \quad (400)$$

$$= \Pr(K_{2,B} = 1 | K_A = 1, Y_{1:N} = y_{1:N}, X = x, Z = z) \quad (401)$$

$$= 1 - \Pr(K_{2,B} \neq 1 | K_A = 1, Y_{1:N} = y_{1:N}, X = x, Z = z) \quad (402)$$

$$= 1 - \Pr \left( \min_{j \neq 1} \frac{S_j}{\frac{\tilde{P}_{Y|Z}(y_j | z)}{\hat{Z}(\tilde{P}_{Y|Z=z}, y_{1:N})}} \leq \frac{S_1}{\frac{\tilde{P}_{Y|Z}(y_1 | z)}{\hat{Z}(\tilde{P}_{Y|Z=z}, y_{1:N})}} \middle| K_A = 1, Y_{1:N} = y_{1:N}, X = x, Z = z \right) \quad (403)$$

$$= 1 - \Pr \left( \min_{j \neq 1} \frac{S_j}{\frac{\tilde{P}_{Y|Z}(y_j | z)}{\hat{Z}(\tilde{P}_{Y|Z=z}, y_{1:N})}} \leq \frac{S_1}{\frac{\tilde{P}_{Y|Z}(y_1 | z)}{\hat{Z}(\tilde{P}_{Y|Z=z}, y_{1:N})}} \middle| K_A = 1, Y_{1:N} = y_{1:N}, X = x \right) \quad (404)$$

$$= 1 - \Pr \left( \min_{j \neq 1} \frac{S_j}{\frac{\tilde{P}_{Y|Z}(y_j | z)}{\hat{Z}(\tilde{P}_{Y|Z=z}, y_{1:N})}} \leq \frac{S_1}{\frac{\tilde{P}_{Y|Z}(y_1 | z)}{\hat{Z}(\tilde{P}_{Y|Z=z}, y_{1:N})}} \middle| K_{2,A} = 1, Y_{1:N} = y_{1:N}, X = x \right) \quad (405)$$

$$\geq \left( 1 + \frac{P_{Y|X}(y_1 | x)}{\tilde{P}_{Y|Z}(y_1 | z)} \frac{\hat{Z}(\tilde{P}_{Y|Z=z}, y_{1:N})}{\hat{Z}(P_{Y|X=x}, y_{1:N})} \right)^{-1}, \quad (406)$$

1188 where (404) is due to the Markov condtion  $Z - (X, Y) - W$ , (405) is due to the fact that the uniform  
1189 random variable  $U$  is independent of  $S_1^N$  and (406) is due to the conditional importance matching  
1190 lemma [32]. We note the following events are equivalent:

$$\{K_A = 1, Y_{1:N} = y_{1:N}, X = x, Z = z, K_{2,B} = 1\} \quad (407)$$

$$\triangleq \left\{ U \leq \frac{\hat{Z}(P_{Y|X=x}, y_{1:N})}{\hat{Z}(P_{Y|X=x}, y_{2:N}) + \omega_x}, Y_{1:N} = y_{1:N}, X = x, Y_{K_A} = y_1, Z = z \right\} \quad (408)$$

$$\triangleq \mathcal{E} \cap \{Z = z\} \quad (409)$$

1191 where  $\mathcal{E} = \left\{ U \leq \frac{\hat{Z}(P_{Y|X=x, y_{1:N}})}{\hat{Z}(P_{Y|X=x, y_{2:N}}) + \omega_x}, Y_{1:N} = y_{1:N}, X = x, Y_{K_A} = y_1 \right\}$ . Then, we have:

$$E_3 = \Pr(K_{1,B} = 1 | K_A = 1, Y_{1:N} = y_{1:N}, X = x, Z = z, K_{2,B} = 1) \quad (410)$$

$$= \Pr \left( U \leq \frac{\hat{Z}(\tilde{P}_{Y|Z=z, Y_{1:N}})}{\hat{Z}(\tilde{P}_{Y|Z=z, Y_{2:N}}) + \omega_z} \middle| \mathcal{E}, Z = z \right) \quad (411)$$

$$= \Pr \left( U \leq \frac{\hat{Z}(\tilde{P}_{Y|Z=z, Y_{1:N}})}{\hat{Z}(\tilde{P}_{Y|Z=z, Y_{2:N}}) + \omega_z} \middle| \mathcal{E} \right) \quad (412)$$

$$= \min \left( 1, \frac{\hat{Z}(\tilde{P}_{Y|Z=z, Y_{1:N}})}{\hat{Z}(\tilde{P}_{Y|Z=z, Y_{2:N}}) + \omega_z} \cdot \frac{\hat{Z}(P_{Y|X=x, y_{2:N}}) + \omega_x}{\hat{Z}(P_{Y|X=x, y_{1:N}})} \right), \quad (413)$$

1192 where the second to last equality is due to the Markov condition  $Z - (X, Y) - W$ .

1193 Combining all three terms  $E_1, E_2, E_3$  and continue from step (392), we have:

$$\Pr(Y_{K_A} = Y_{K_B} | Y_{K_A} = y_1, X = x, Z = z) \quad (414)$$

$$\geq N \int \frac{Q_Y(y_{2:N})}{\hat{Z}(P_{Y|X=x, y_{2:N}}) + \omega_x} \left( 1 + \frac{P_{Y|X}(y_1|x)}{\tilde{P}_{Y|Z}(y_1|z)} \frac{\hat{Z}(\tilde{P}_{Y|Z=z, y_{1:N}})}{\hat{Z}(P_{Y|X=x, y_{1:N}})} \right)^{-1} \\ \times \min \left( 1, \frac{\hat{Z}(\tilde{P}_{Y|Z=z, Y_{1:N}})}{\hat{Z}(\tilde{P}_{Y|Z=z, Y_{2:N}}) + \omega_z} \cdot \frac{\hat{Z}(P_{Y|X=x, y_{2:N}}) + \omega_x}{\hat{Z}(P_{Y|X=x, y_{1:N}})} \right) dy_{2:N} \quad (415)$$

$$= N \int \frac{Q_Y(y_{2:N})}{\hat{Z}(P_{Y|X=x, y_{1:N}})} \left( 1 + \frac{P_{Y|X}(y_1|x)}{\tilde{P}_{Y|Z}(y_1|z)} \frac{\hat{Z}(\tilde{P}_{Y|Z=z, y_{1:N}})}{\hat{Z}(P_{Y|X=x, y_{1:N}})} \right)^{-1} \\ \times \min \left( \frac{\hat{Z}(P_{Y|X=x, y_{1:N}})}{\hat{Z}(P_{Y|X=x, y_{2:N}}) + \omega_x}, \frac{\hat{Z}(\tilde{P}_{Y|Z=z, Y_{1:N}})}{\hat{Z}(\tilde{P}_{Y|Z=z, Y_{2:N}}) + \omega_z} \right) dy_{2:N} \quad (416)$$

$$\geq \int \frac{NQ_Y(y_{2:N})}{\hat{Z}(P_{Y|X=x, y_{1:N}})} \left( 1 + \frac{P_{Y|X}(y_1|x)}{\tilde{P}_{Y|Z}(y_1|z)} \frac{\hat{Z}(\tilde{P}_{Y|Z=z, y_{1:N}})}{\hat{Z}(P_{Y|X=x, y_{1:N}})} \right)^{-1} \\ \times \left( \frac{\hat{Z}(P_{Y|X=x, y_{1:N}})}{\hat{Z}(P_{Y|X=x, y_{2:N}}) + \omega} \cdot \frac{\hat{Z}(\tilde{P}_{Y|Z=z, Y_{1:N}})}{\hat{Z}(\tilde{P}_{Y|Z=z, Y_{2:N}}) + \omega} \right) dy_{2:N} \quad (417)$$

1194 with the last inequality follows the fact that  $\omega > \max(\omega_x, \omega_z)$ . The rest of the proof follows similar  
1195 steps as in the proof of Proposition F.4. This completes the proof.

## 1196 G ERS Matching with Batch Communication

1197 **Setup.** We first describe the setup in the case where the selected batch index is communicated from  
 1198 the encoder to the decoder. The main difference between this and the setup in Section 5.3 is that the  
 1199 decoder (party  $B$ ) will use the Gumbel-Max selection method instead of the ERS one, since it knows  
 1200 which batch the encoder index belongs to. Furthermore, we note this scheme requires a noiseless  
 1201 channel between the encoder and decoder, which is available in the distributed compression scenario.  
 1202 Similarly to Section 3.2.2, let  $(X, Y, Z) \in \mathcal{X} \times \mathcal{Y} \times \mathcal{Z}$  with a joint distribution  $P_{X,Y,Z}$ . We use the  
 1203 same common randomness  $W$  as in Section 5.3, with the proposal distribution  $Q_Y$  requiring that the  
 1204 bounding condition hold for the tuple  $(P_{Y|X=x}, Q_Y)$ . The protocol is as follows:

- 1205 1. The encoder receives the input  $X = x \sim P_X$  and selects its value using ERS procedure:

$$K_A = \text{ERS}(W; P_{Y|X=x}, Q_Y), \quad (418)$$

1206 and sends the batch index  $K_{1,A}$  to the decoder. It then sets  $Y_A = Y_{K_A}$

- 1207 2. Given  $X = x, Y_A = y$ , we generate  $Z = z \sim P_{Z|X,Y}(\cdot|x, y)$  and note that the Markov  
 1208 chain  $Z - (X, Y_A) - W$  holds.

- 1209 3. The decoder receives the batch index  $K_{1,A}$  and  $Z = z$  will use the Gumbel Max process to  
 1210 queries a sample from the common randomness  $W$ :

$$K_{1,B} = K_{1,A} \quad K_{2,B} = \text{Gumbel}(B_{K_{1,A}}; \tilde{P}_{Y|Z=z}, Q_Y) \quad K_B = (K_{1,B} - 1)N + K_{2,B},$$

1211 and output  $Y_B = Y_{K_B}$ . The procedure  $\text{Gumbel}(\cdot)$  corresponds to Step 1,2 in Algorithm 1.

1212 Given the above setup, we have the following bound on the matching event  $\{Y_A = Y_B\}$ :

1213 **Proposition G.1.** Let  $K_A, K_B, P_{Y|X}(\cdot|X = x)$  and  $\tilde{P}_{Y|Z}(\cdot|z)$  defined above and set  $P_Y^A =$   
 1214  $P_{Y|X=x}, P_Y^B = \tilde{P}_{Y|Z=z}$ . For  $N \geq 2$ , we have:

$$\Pr(Y_A = Y_B | Y_A = y, X = x, Z = z) \geq \left( 1 + \mu'_1(N) + \frac{P_Y^A(y)}{P_Y^B(y)} (1 + \mu'_2(N)) \right)^{-1}, \quad (419)$$

1215 where  $\mu'_1(N)$  and  $\mu'_2(N)$  are defined as in Appendix G.1 and we note that  $\mu'_1(N), \mu'_2(N) \rightarrow 0$  as  
 1216  $N \rightarrow \infty$  with rate  $N^{-1}$  under mild assumptions on the distributions  $P_{Y|X}(y|x)$  and  $Q_Y(\cdot)$ .

1217 *Proof.* See Appendix G.2. □

### 1218 G.1 Coefficients in Proposition G.1

1219 We define the coefficient  $\mu'_1(N)$  and  $\mu'_2(N)$  in Proposition G.1.

$$\mu'_1(N) = \frac{3\omega}{N} \quad (420)$$

$$\mu'_2(N) = \frac{\omega}{N} \mathbb{I}_N(\omega, 2) d_2(Q_Y || P_{Y|X=x}) \quad (421)$$

1220 where we define  $\mathbb{I}_N(\omega, i) \triangleq (2\mathbb{I}_{N>i} + \omega \mathbb{I}_{N=i})$  as in Proposition F.3 and  $\omega = \max_y \frac{P_{Y|X}(y|x)}{Q_Y(y)}$ .

### 1221 G.2 Proof of Proposition G.1

1222 We now formally prove the bound Proposition G.1. First, we define:

$$\hat{Z}(P_{Y|X=x}, y_{1:N}) = \sum_{i=1}^N \frac{P_{Y|X}(y_i|x)}{Q_Y(y_i)}, \quad \hat{Z}(\tilde{P}_{Y|Z=z}, y_{1:N}) = \sum_{i=1}^N \frac{\tilde{P}_{Y|Z}(y_i|z)}{Q_Y(y_i)} \quad (422)$$

1223 Recall that  $K_{2,A}$  is the local index within the selected batch by party  $A$  and  $Y_{K_{1,A},1:N}$  are the samples  
 1224 within the selected batch, we have:

$$\Pr(Y_A = Y_B | Y_A = y_1, X = x, Z = z) \quad (423)$$

$$= \Pr(Y_{K_A} = Y_{K_B} | Y_{K_A} = y_1, X = x, Z = z) \quad (424)$$

$$\geq \Pr(K_{2,A} = K_{2,B} | Y_{K_A} = y_1, X = x, Z = z) \quad (425)$$

$$= \sum_{i=1}^N \Pr(K_{2,A} = K_{2,B} = i | Y_{K_A} = y_1, X = x, Z = z) \quad (426)$$

$$= N \Pr(K_{2,A} = K_{2,B} = 1 | Y_{K_A} = y_1, X = x, Z = z) \quad (\text{Due to Symmetry}) \quad (427)$$

$$= N \Pr(K_{2,A} = K_{2,B} | Y_{K_A} = y_1, K_{2,A} = 1, X = x, Z = z) \\ \times \Pr(K_{2,A} = 1 | Y_{K_A} = y_1, X = x, Z = z) \quad (428)$$

$$= \Pr(K_{2,A} = K_{2,B} | Y_{K_A} = y_1, K_{2,A} = 1, X = x, Z = z) \quad (429)$$

$$= \int_{-\infty}^{\infty} P(Y_{K_{1,A},2:N} = y_{2:N} | Y_{K_A} = y_1, K_{2,A} = 1, X = x, Z = z) \\ \times \Pr(K_{2,A} = K_{2,B} | Y_{K_A} = y_1, K_{2,A} = 1, Y_{K_{1,A},2:N} = y_{2:N}, X = x, Z = z) dy_{2:N}, \quad (430)$$

1225 where (429) is due to  $\Pr(K_{2,A} = 1 | Y_{K_A} = y_1, X = x, Z = z) = N^{-1}$ . Let  $Y_{1:N} \sim Q$  are  $N$  i.i.d.  
 1226 proposal samples, then  $\{Y_{K_A,1:N} = y_{1:N}\} = \{Y_{1:N} = y_{1:N}, A \text{ accepts } Y_{1:N}\}$  and we have:

$$\Pr(K_{2,A} = K_{2,B} | Y_{K_A} = y_1, K_{2,A} = 1, Y_{K_{1,A},2:N} = y_{2:N}, X = x, Z = z) \quad (431)$$

$$= 1 - \Pr(K_{2,B} \neq 1 | Y_{K_{1,A},1:N} = y_{1:N}, K_{2,A} = 1, Y_{K_A} = y_1, X = x, Z = z) \\ = 1 - \Pr\left(\min_{j \neq 1} \frac{S_j}{\frac{\tilde{P}_{Y|Z}(y_j|z)}{\hat{Z}(\tilde{P}_{Y|Z=z, y_{1:N}})}} \leq \frac{S_1}{\frac{\tilde{P}_{Y|Z}(y_1|z)}{\hat{Z}(\tilde{P}_{Y|Z=z, y_{1:N}})}} \mid Y_{1:N} = y_{1:N}, A \text{ selects 1st index}, \right. \\ \left. A \text{ accepts } Y_{1:N}, Y_{K_A} = y_1, X = x, Z = z\right) \quad (432)$$

$$= 1 - \Pr\left(\min_{j \neq 1} \frac{S_j}{\frac{\tilde{P}_{Y|Z}(y_j|z)}{\hat{Z}(\tilde{P}_{Y|Z=z, y_{1:N}})}} \leq \frac{S_1}{\frac{\tilde{P}_{Y|Z}(y_1|z)}{\hat{Z}(\tilde{P}_{Y|Z=z, y_{1:N}})}} \mid Y_{1:N} = y_{1:N}, A \text{ selects 1st index}, \right. \\ \left. A \text{ accepts } Y_{1:N}, Y_{K_A} = y_1, X = x\right) \quad (433)$$

$$= 1 - \Pr\left(\min_{j \neq 1} \frac{S_j}{\frac{\tilde{P}_{Y|Z}(y_j|z)}{\hat{Z}(\tilde{P}_{Y|Z=z, y_{1:N}})}} \leq \frac{S_1}{\frac{\tilde{P}_{Y|Z}(y_1|z)}{\hat{Z}(\tilde{P}_{Y|Z=z, y_{1:N}})}} \mid Y_{1:N} = y_{1:N}, A \text{ selects 1st index}, X = x\right) \quad (434)$$

$$\geq \left(1 + \frac{P_{Y|X}(y_1|x)}{\tilde{P}_{Y|Z}(y_1|z)} \frac{\hat{Z}(\tilde{P}_{Y|Z=z, y_{1:N}})}{\hat{Z}(P_{Y|X=x, y_{1:N}})}\right), \quad (435)$$

1227 where (433) is due to Markov property  $Z - (X, Y) - W$ , i.e.  $Z$  has no effects on the statistics of the  
 1228 exponential random variables. Line (434) is due to the fact that conditioning on  $A$  selected the 1st  
 1229 index, whether  $A$  selects  $Y_{1:N}$  or not depends only on  $U$ . The final inequality is due to conditional  
 1230 matching lemma from [32].

1231 Recall that  $\omega = \max_y \frac{P_{Y|X}(y|x)}{Q_Y(y)}$ , we have:

$$P(Y_{K_{1,A},2:N} = y_{2:N} | Y_{K_A} = y_1, K_{2,A} = 1, X = x, Z = z) \quad (436)$$

$$= P(Y_{K_{1,A},2:N} = y_{2:N} | Y_{K_A} = y_1, K_{2,A} = 1, X = x) \quad (437)$$

$$= \frac{\bar{P}_{Y,K_{2,A}|X}(y_{1:N}, 1|x)}{P_{Y|X}(y_1|x)N^{-1}} \quad (438)$$

$$= \frac{NQ_Y(y_{2:N})}{\Delta_{P_{Y|X=x}}(\hat{Z}(P_{Y|X=x, y_{2:N}}) + \omega)} \quad (439)$$

1232 where  $\bar{P}_{Y,K_{2,A}|X}(y_{1:N}, 1|x)$  is the ERS target distribution (151) where we use  $P_{Y|X}(\cdot|x)$  as the  
 1233 target distribution and  $\Delta_{P_{Y|X=x}} < 1$  is the normalized constant. We now shorthand  $P_Y^A \triangleq P_{Y|X=x}$ ,

1234  $P_Y^B \triangleq \tilde{P}(Y|Z=z)$  and  $\Delta_{P_Y^A} \triangleq \Delta_{P_{Y|X=x}}$ , and combining the two expressions, we have:

$$\Pr(Y_A = Y_B | Y_A = y_1, X = x, Z = z) \quad (440)$$

$$\geq \mathbb{E}_{Y_{2:N} \sim Q_Y} \left[ \frac{N}{(\hat{Z}(P_Y^A, y_{2:N}) + \omega) \Delta_{P_Y^A} \left(1 + \frac{P_Y^A(y_1)}{P_Y^B(y_1)} \frac{\hat{Z}(P_Y^B, y_{1:N})}{\hat{Z}(P_Y^A, y_{1:N})}\right)} \right] \quad (441)$$

$$\geq \mathbb{E}_{Y_{2:N} \sim Q_Y} \left[ \frac{N}{(\hat{Z}(P_Y^A, y_{2:N}) + \omega) \left(1 + \frac{P_Y^A(y_1)}{P_Y^B(y_1)} \frac{\hat{Z}(P_Y^B, y_{1:N})}{\hat{Z}(P_Y^A, y_{1:N})}\right)} \right] \quad (\text{Since } \Delta_{P_Y^A} \leq 1) \quad (442)$$

$$\geq \left( \mathbb{E}_{Y_{2:N} \sim Q_Y} \left[ \frac{(\hat{Z}(P_Y^A, y_{2:N}) + \omega)}{N} \left(1 + \frac{P_Y^A(y_1)}{P_Y^B(y_1)} \frac{\hat{Z}(P_Y^B, y_{1:N})}{\hat{Z}(P_Y^A, y_{1:N})}\right) \right] \right)^{-1} \quad (\text{By Jensen's Inequality}) \quad (443)$$

1235 Since:

$$\mathbb{E}_{Y_{2:N} \sim Q_Y} \left[ \frac{\hat{Z}(P_Y^A, y_{2:N}) + \omega}{N} \right] \leq \frac{N-1}{N} + \frac{\omega}{N} \quad (444)$$

1236 and:

$$\mathbb{E}_{Y_{2:N} \sim Q_Y} \left[ \left( \frac{\hat{Z}(P_Y^A, y_{2:N}) + \omega}{N} \right) \frac{\hat{Z}(P_Y^B, y_{1:N})}{\hat{Z}(P_Y^A, y_{1:N})} \right] \quad (445)$$

$$= \mathbb{E}_{Y_{2:N} \sim Q_Y} \left[ \frac{\hat{Z}(P_Y^A, y_{2:N})}{N} \frac{\hat{Z}(P_Y^B, y_{1:N})}{\hat{Z}(P_Y^A, y_{1:N})} + \frac{\omega}{N} \frac{\hat{Z}(P_Y^B, y_{1:N})}{\hat{Z}(P_Y^A, y_{1:N})} \right] \quad (446)$$

$$\leq \frac{N-1}{N} + \frac{P_Y^B(y_1)/Q_Y(y_1)}{N} + \frac{\omega}{N} \mathbb{E}_{Y_{2:N} \sim Q_Y} \left[ \frac{\hat{Z}(P_Y^B, y_{1:N})}{\hat{Z}(P_Y^A, y_{1:N})} \right] \quad (447)$$

1237 where we have:

$$\mathbb{E}_{Y_{2:N} \sim Q_Y} \left[ \frac{\hat{Z}(P_Y^B, y_{1:N})}{\hat{Z}(P_Y^A, y_{1:N})} \right] = \mathbb{E}_{Y_{2:N} \sim Q_Y} \left[ \frac{P_Y^B(y_1)/Q_Y(y_1)}{\hat{Z}(P_Y^A, y_{1:N})} + \frac{\hat{Z}(P_Y^B, y_{2:N})}{\hat{Z}(P_Y^A, y_{1:N})} \right] \quad (448)$$

$$\leq \mathbb{E}_{Y_{2:N} \sim Q_Y} \left[ \frac{P_Y^B(y_1)/Q_Y(y_1)}{P_Y^A(y_1)/Q_Y(y_1)} \right] + \mathbb{E}_{Y_{2:N} \sim Q_Y} \left[ \frac{\hat{Z}(P_Y^B, y_{2:N})}{\hat{Z}(P_Y^A, y_{2:N})} \right] \quad (449)$$

$$\leq \frac{P_Y^B(y_1)}{P_Y^A(y_1)} + \mathbb{I}_N(\omega, 2) d_2(Q_Y || P_Y^A) \quad (450)$$

1238 Then, combining (450) into (447), then combine with (444) into the term (443), we have:

$$\Pr(Y_A = Y_B | Y_A = y_1, X = x, Z = z) \quad (451)$$

$$\geq \left( 1 + \frac{\omega}{N} + \frac{P_Y^A(y_1)}{P_Y^B(y_1)} \left( \frac{N-1}{N} + \frac{P_Y^B(y_1)/Q_Y(y_1)}{N} + \frac{\omega}{N} \left( \frac{P_Y^B(y_1)}{P_Y^A(y_1)} + \mathbb{I}_N(\omega, 2) d_2(Q_Y || P_Y^A) \right) \right) \right)^{-1} \quad (452)$$

$$= \left( 1 + \frac{\omega}{N} + \frac{P_Y^A(y_1)}{P_Y^B(y_1)} \left( \frac{N-1}{N} + \frac{P_Y^B(y_1)/Q_Y(y_1)}{N} + \frac{\omega}{N} \left( \frac{P_Y^B(y_1)}{P_Y^A(y_1)} + \mathbb{I}_N(\omega, 2) d_2(Q_Y || P_Y^A) \right) \right) \right)^{-1} \quad (453)$$

$$\geq \left( 1 + \frac{3\omega}{N} + \frac{P_Y^A(y_1)}{P_Y^B(y_1)} \left( 1 + \frac{\omega}{N} \mathbb{I}_N(\omega, 2) d_2(Q_Y || P_Y^A) \right) \right)^{-1} \quad (454)$$

$$= \left( 1 + \mu'_1(N) + \frac{P_Y^A(y_1)}{P_Y^B(y_1)} (1 + \mu'_2(N)) \right)^{-1}, \quad (455)$$

1239 where we repeatedly use the fact that  $P_Y^A(y)/Q_Y(y) \leq \omega$ . This completes the proof.

## 1240 H Proof of Proposition 5.6

---

### Algorithm 2: Wyner-Ziv Distributed Compression Protocol

---

**Encoder:** Receives  $X = x$  and  $W$ , performs:

1241 1. Select  $K_A = \text{ERS}(W; P_{Y'|X=x}, Q_{Y'})$ ; 2. Sends  $(K_{1,A}, V_{K_A})$  to the decoder.

1 **Decoder:** Receives  $Z = (V_{K_A}, K_{1,A}, X')$  and  $W$ , performs:

1. Keep batch  $K_{1,A}$ ; 2. Remove all  $j$  where  $V_{K_{1,A},j} \neq V_{K_A}$ ; 3. Select  $K_B$  with  $P_{Y'|X'=x'}$ .

---

1242 **Main Proof.** We remind the protocol in Algorithm 2. The encoder and decoder's target distribution  
1243 for this case are:

$$P_Y^A(y, v) = P_{Y|X}(y|x)P_V(v) \quad P_Y^B(y, v) = P_{Y|X'}(y|x')\mathbb{I}_V(v) \quad (456)$$

1244 For a sufficient large batch size  $N$  and apply Proposition G.1, we have:

$$\Pr(Y'_{K_A} \neq Y'_{K_B} | (Y'_{K_A}, V_{K_A}) = (y', v), X = x, Z = (x', v)) \quad (457)$$

$$= \Pr((Y'_{K_A}, V_{K_A}) \neq (Y'_{K_B}, V_{K_B}) | (Y'_{K_A}, V_{K_A}) = (y', v), X = x, Z = (x', v)) \quad (458)$$

$$\leq 1 - \left(1 + \epsilon + \frac{P_{Y'|X}(y'|x)P_V(v)}{P_{Y'|X'}(y'|x')\mathbb{I}_v(v)}(1 + \epsilon)\right)^{-1} \quad (459)$$

$$\leq 1 - \left(1 + \epsilon + \mathcal{V}^{-1}(1 + \epsilon) \frac{P_{Y'|X}(y'|x)}{P_{Y'|X'}(y'|x')}\right)^{-1} \quad (460)$$

$$= 1 - \left(1 + \epsilon + \mathcal{V}^{-1}(1 + \epsilon) \frac{P_{Y'|X}(y'|x)}{P_Y'(y')} \frac{P_Y'(y')}{P_{Y'|X'}(y'|x')}\right)^{-1} \quad (461)$$

$$= 1 - \left(1 + \epsilon + \mathcal{V}^{-1}(1 + \epsilon) 2^{i_{Y',X}(y';x) - i_{Y',X'}(y';x')}\right)^{-1} \quad (462)$$

1245 Finally, taking the expectation of both sides yields the final result.

1246 **Coding Cost.** In terms of the bound on  $r$ , recall the following bound on batch acceptance probability:

$$\Delta = \mathbb{E}_{Y_{1:N} \sim P_Y(\cdot)} \left[ \frac{N}{\bar{Z}(1, Y'_{1:N})} \right] \geq \frac{N}{\mathbb{E}_{Y_{1:N} \sim P_Y(\cdot)} [\bar{Z}(1)]} = \frac{N}{N - 1 + \omega} \quad (463)$$

1247 Here for  $N = \omega$ , we have  $\Delta > \frac{1}{2}$  and thus the chunk size  $L = \lfloor \Delta^{-1} \rfloor$  in the ERS coding scheme is 1  
1248 and thus do not need to send  $\hat{K}_1$ . Using the fact that  $\mathbb{E}[\log L] \leq 1$ , we have  $r \leq H[L] + 1 = 4\text{bits}$   
1249 by entropy coding with Zipf distribution [25].

**Compressing Multiple Samples.** When compressing  $n$  samples jointly, let the rate per sample (without the overhead for batch communication) be  $r'$  where  $\log(V) = nr'$  consider the following approximation:

$$\sum_{i=1}^n i(y'_i; x_i) - i(y'_i; x'_i) \approx nI(X; Y'|X'),$$

1250 Then we have:

$$2^{\sum_{i=1}^n [i(y'_i; x_i) - i(y'_i; x'_i)] - \log(V)} \approx 2^{nI(X; Y'|X') - \log(V)} \quad (464)$$

$$= 2^{n(I(X; Y'|X') - r')}, \quad (465)$$

1251 and thus, if  $r' > I(X; Y'|X')$ , by increasing  $n$  we reduces the mismatching probability while  
1252 maintaining the compression rate per sample. We visualize this in the experimental results with  
1253  $N = 2^{19}$  in Figure 9.

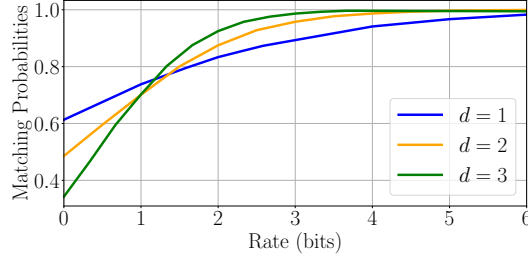

Figure 9: Matching Probabilities with  $N = 2^{19}$  and jointly compressing 1, 2, 3 i.i.d. samples respectively. Target distortion  $\sigma_{Y'|X}^2 = 0.008$  for every samples.

## I Feedback Scheme

In distributed compression, decoding errors can lead to significant average reconstruction distortion. To address this, feedback communication from the decoder can be employed to correct errors and enhance rate-distortion performance, as proposed in [32]. The feedback mechanism is identical for both ERS and IML, except that ERS additionally transmits the batch index to the decoder.

We recall that  $K_{1,A}$  and  $K_{2,A}$  denote the batch index and local index, respectively, of samples selected by party  $A$  through the ERS sample selection. On the other hand, party  $B$  uses Gumbel-Max selection process to output its selected local index  $K_{2,B}$  within the  $K_{1,A}$  batch, then the ERS process can be described as follows:

1. *Index Selection.* After transmitting the batch index  $K_{1,A}$ , the encoder sends the  $\log_2(\mathcal{V})$  least significant bits (LSB) of the selected index  $K_{2,A}$  to the decoder.
2. *Decoding and Feedback.* The decoder outputs  $K_{2,B}$  and sends the  $\log_2(N/\mathcal{V})$  most significant bits (MSB) of  $K_B$  to the encoder.
3. *Re-transmission.* Based on the received MSB feedback, if the index is correct, the encoder responds with an acknowledgment bit, say 1. Otherwise, it sends 0 along with the MSB of its selection to the decoder.

We note that, in this context, using LSB instead of random bits in step 1 does not yield a noticeable difference in performance. For the rate-distortion analysis, the rate is computed based on the total length of messages transmitted during index selection and re-transmission, including any acknowledgment messages. However, the rate of the feedback message is excluded from this calculation, which can be justified in scenarios with asymmetric communication costs in the forward and reverse directions, such as in wireless channels.

## J Neural Contrastive Estimator

In our ERS scheme, the selection rule requires estimating the following ratio at the decoder side:

$$\tilde{K}_B = \operatorname{argmin}_{1 \leq k \leq N} \frac{S_{ik}}{\frac{P_{Y|X'}(y|x')\mathbb{I}_V(v)}{Q_Y(Y_{ik})V^{-1}}}, \text{ where } i = K_{1,A}, \quad (466)$$

where the normalization term can be ignored as it is the same for every sample in the batch  $K_{1,A}$ . Our goal is to learn the ratio  $P_{Y|X'}(Y_{ik}|x')/Q_Y(Y_{ik})$  from data. In particular, we can access the data samples from the joint distribution  $P_{X,Y,X'}$ .

To this end, we construct a binary neural classifier  $h'(y, x') = \frac{1}{1 + \exp[-h(y, x')]}$  which classifies if the input  $(y, x')$  is distributed according to the marginal distribution  $Q_Y(\cdot) \times P_{X'}(\cdot)$  (positive samples) or the joint  $P_{Y,X'}$  (negative samples). Once converged, we can use the logits value  $h(y, x')$  to compute the log of the ratio of interest [19]. In particular:

$$h(y, x') \approx -\log \frac{P_{Y|X'}(Y_{ik}|x')}{Q_Y(y)} \quad (467)$$

1285 This allows us to estimate the ratio without needing to obtain the exact ratio’s value. Finally, to  
1286 generate the positive samples, we simply generate  $Y \sim Q_Y(\cdot)$  and get a random  $X'$  from the training  
1287 data. For negative samples, we generate the data according to the Markov sequence  $X' - X - Y$ .  
1288 The ratio between the two labels should be the same.

## 1289 K Distributed Compression with MNIST

### 1290 K.0.1 Training Details

1291  **$\beta$ -VAE Architecture.** We adopt a setup similar to [32]. Our neural encoder-decoder model comprises  
1292 an encoder network  $y = \text{enc}(x)$ , a projection network  $\text{proj}(x')$ , and a decoder network  $\hat{x} =$   
1293  $\text{dec}(y, \text{proj}(x'))$ , as detailed in Table 1. The encoder network converts an image into two vectors  
1294 of size 3 (total 6D output), with the first vector representing the output mean  $\mu(x)$  and the second  
1295 representing the output variance  $\sigma^2(x)$ . Here, we define  $p_{Y|X}(\cdot|x) = \mathcal{N}(\mu(x), \sigma^2(x))$  and use the  
1296 prior distribution  $p_Y(\cdot) = \mathcal{N}(0, 1)$ . At the decoder side (party  $B$ ), the projection network first  
1297 maps the side information image  $X'$  to a 128-dimensional vector, which is then combined with a  
1298 3-dimensional vector from the encoder. This concatenated vector is input to the decoder network,  
1299 producing a reconstructed output of size  $28 \times 28$ .

Table 1: Architecture of the encoder, projection network, and decoder for distributed MNIST image compression. Convolutional and transposed convolutional layers are denoted as “conv” and “upconv,” respectively, with specifications for the number of filters, kernel size, stride, and padding. For “upconv,” an additional output padding parameter is included.

| (a)Encoder                    | (b)Projection Network         | (c)Decoder Network        |
|-------------------------------|-------------------------------|---------------------------|
| Input $28 \times 28 \times 1$ | Input $14 \times 14 \times 1$ | Input-(3+128)             |
| conv (128:3:1:1), ReLU        | conv (32:3:1:1), ReLU         | Linear-(132, 512), ReLU   |
| conv (128:3:2:1), ReLU        | conv (64:3:2:1), ReLU         | upconv (64:3:2:1:1), ReLU |
| conv (128:3:2:1), ReLU        | conv (128:3:2:1), ReLU        | upconv (32:3:2:1:1), ReLU |
| Flatten                       | Flatten                       | upconv (1:3:1:1), Tanh    |
| Linear (6272, 512), ReLU      | Linear (2048, 512), ReLU      |                           |
| Linear (512, 6)               | Linear (512, 128)             |                           |

1300 **Loss Function** We train our  $\beta$ -VAE network by optimizing the following rate-distortion loss function:

$$\mathcal{L} = \beta(X - \hat{X})^2 + E_X[D_{\text{KL}}(p_{Y|X}(\cdot|v)||p_Y(\cdot))] \quad (468)$$

1301 where we vary  $\beta$  for different rate-distortion tradeoff. Each model is trained for 30 epochs on  
1302 an NVIDIA RTX A4500, requiring approximately 30 minutes per model. We use random hor-  
1303 izontal flipping and random rotation within the range  $\pm 15^\circ$ . We use the following values of  
1304  $\beta \in \{0.225, 0.28, 0.31, 0.4\}$  that corresponds to the target distortions  $\{6.6, 6.3, 6.1, 5.8\} \times 10^{-2}$  in  
1305 Figure 6.

1306 **Neural Contrastive Estimator Network.** The neural estimator network comprises two subnetworks.  
1307 The first subnetwork projects the side information into a 128-dimensional embedding. The second  
1308 subnetwork combines this 128D embedding with a 4D embedding, derived from either  $p_{Y|X}$  or the  
1309 prior  $p_Y$ , and outputs the probability that  $X', Y$  originate from the joint or marginal distributions.  
1310 The model is trained for 100 epochs.

Table 2: Neural Estimator Networks for Distributed Image Compression.

| (a)Projection Network         | (b) Combine and Classify  |
|-------------------------------|---------------------------|
| Input $14 \times 14 \times 1$ | Input 128 + 3             |
| conv (32:3:1:1), ReLU         | Linear (132, 128), l-ReLU |
| conv (64:3:2:1), ReLU         | Linear (128, 128), l-ReLU |
| conv (128:3:2:1), ReLU        | Linear (128, 128), l-ReLU |
| Flatten                       | Linear (128, 1)           |
| Linear (2048, 512), ReLU      |                           |
| Linear (512, 128)             |                           |

| $\log \mathcal{V}$ | $N$   | $N^*$ | Target dB |
|--------------------|-------|-------|-----------|
| 9.6                | 0.6e6 | 1.0e6 | -21.5dB   |
| 10.6               | 0.7e6 | 1.1e6 | -22dB     |
| 11.6               | 0.8e6 | 1.5e6 | -22.5dB   |
| 12.6               | 1.04  | 1.6e6 | -23dB     |

Table 3: Details for ERS Gaussian Experiment in Figure 5 (right)

## 1311 **L Wyner-Ziv Gaussian Experiment**

1312 In Figure 5 (left), the batch size of ERS are  $N \in \{2^{19}, 2^{20}\}$  respectively for the average number of  
1313 proposals  $N^* \in \{1.1, 1.6\} \times 10^6$ . For Figure 5 (right), details for ERS are shown in Table 3.
